# Supplementary material for: A cyclodecapeptide ligand to vitamin B12
Source: Royal Society of Chemistry journal article supplement (doi:10.1039/b811234g), 2008-01-01

## A Cyclodecapeptide Ligand to Vitamin B<sub>12</sub>

Vincent Dulery,<sup>a)</sup> Nicolas A. Uhlich,<sup>b)</sup> Noélie Maillard,<sup>b)</sup> Viviana S. Fluxá,<sup>b)</sup> Julian Garcia,<sup>a)</sup>  
Pascal Dumy,<sup>a)</sup> Olivier Renaudet,<sup>a)\*</sup> Jean-Louis Reymond<sup>b)\*</sup> and Tamis Darbre<sup>b)\*</sup>

<sup>a)</sup> *Département de Chimie Moléculaire - UMR-CNRS 5250 & ICMG FR 2607, Université  
Joseph Fourier, BP 51, 38041, Grenoble Cedex 9, France*

<sup>b)</sup> *Department of Chemistry and Biochemistry, University of Berne, Freiestrasse 3, CH-3012,  
Berne, Switzerland.*

### Supporting Information:

1. Plots of exchange kinetic with cyanide
2. HPLC traces of bead analysis (amino acid analysis) for the hits
3. Table S1: List of non-hits
4. Table S2 Non-hits amino acid percentage occurrence
5. Amino acid analysis of non-hits in Table S1
6. Table S3: Sequences picked randomly
7. Analytical HPLC profiles and mass spectra (+ESI-MS) data

## 1. Plots of exchange kinetics with cyanide

### Cyclic peptide 4

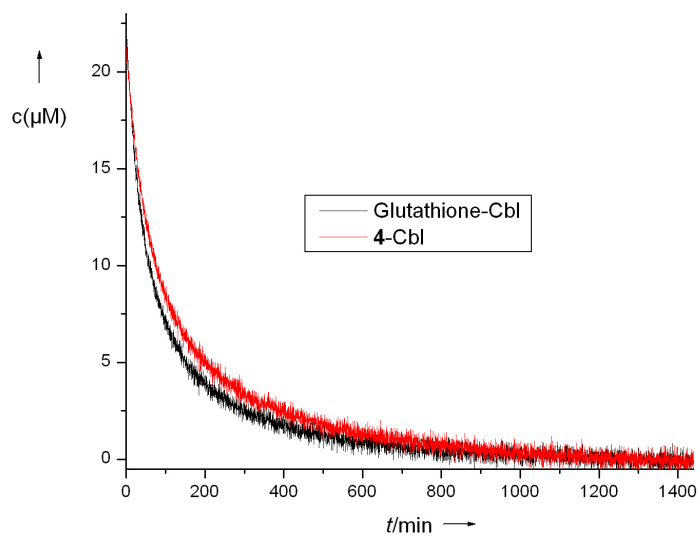

### Linear peptide 4'

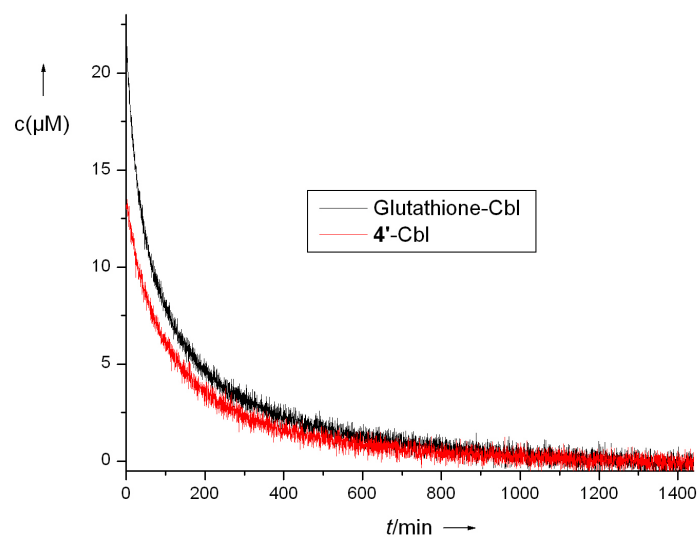

### Linear peptide acetylated 4'Ac

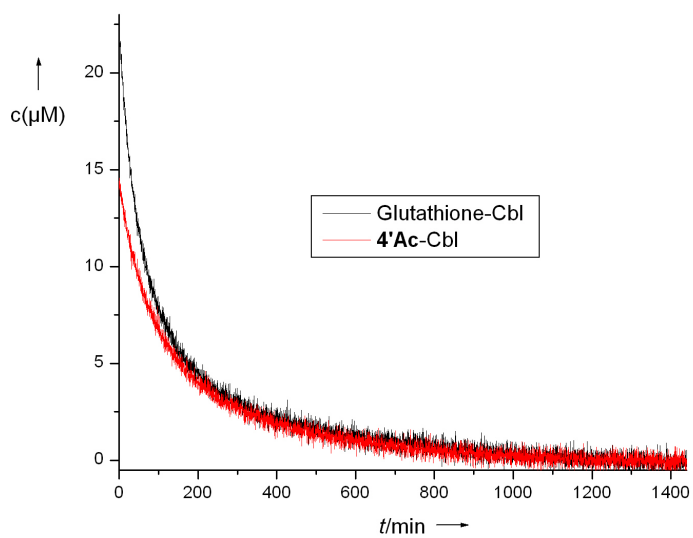

### Cyclic peptide 4His

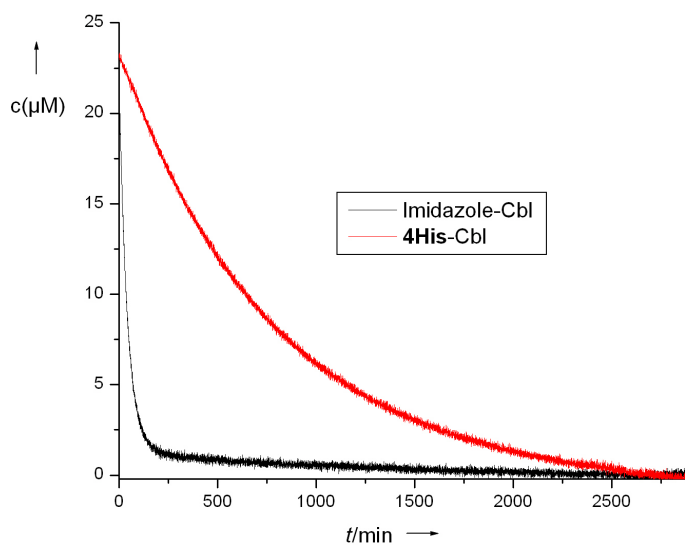

### Linear peptide 4His'

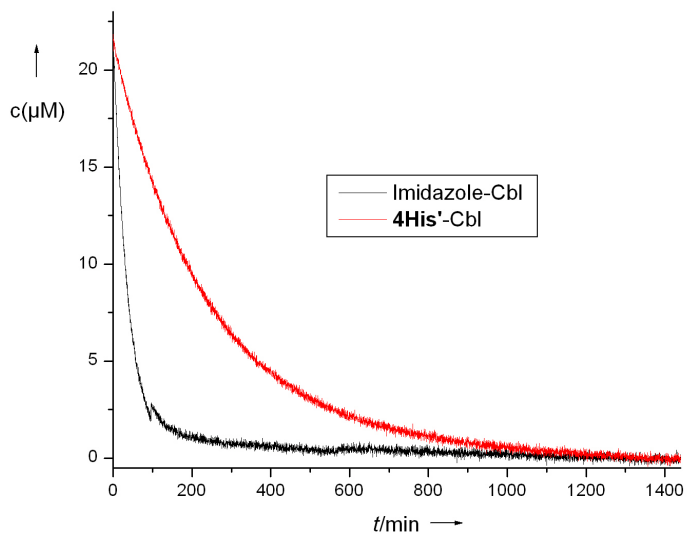

### Linear peptide acetylated 4His'Ac

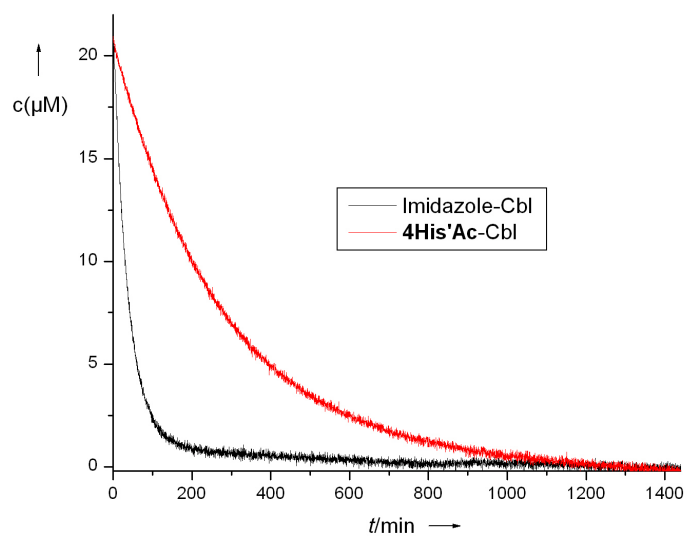

2. HPLC traces of bead analysis (amino acid analysis) for the hits

**Hit 1 c(SDEPGERCPq).**

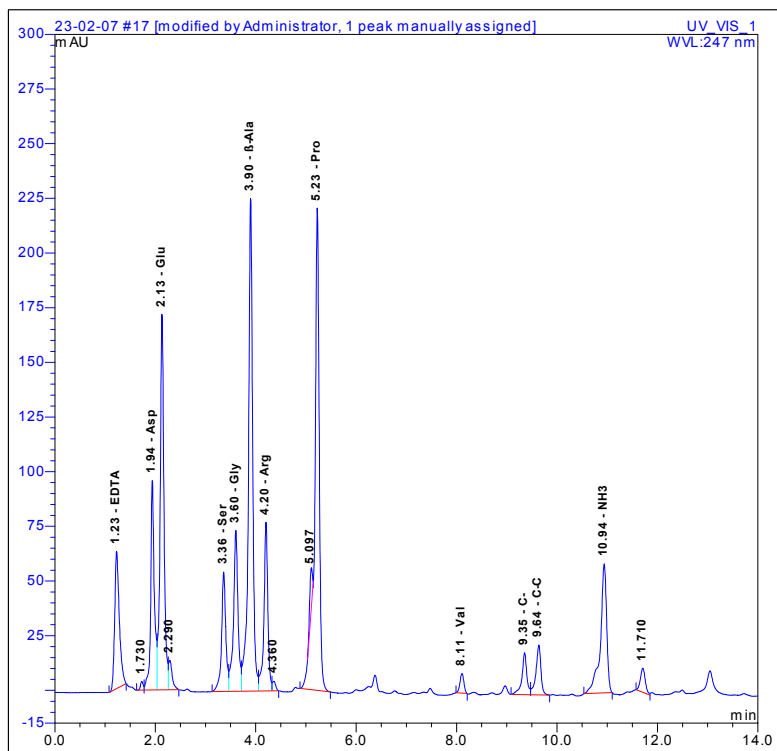

| RT<br>min     | RT (STD)<br>min | PW(50%)<br>min | Area<br>mAU*min | Height<br>mAU | Amount<br>pmol | Peak Name |
|---------------|-----------------|----------------|-----------------|---------------|----------------|-----------|
| 1.23          | 1.23            | 0.093          | 6.67            | 62.76         | 284.5          | EDTA      |
| 1.94          | 1.95            | 0.066          | 8.09            | 95.72         | 530.1          | Asp       |
| 2.13          | 2.14            | 0.075          | 15.40           | 171.65        | 1043.9         | Glu       |
| 3.36          | 3.37            | 0.080          | 5.37            | 54.57         | 380.7          | Ser       |
| 3.60          | 3.61            | 0.086          | 7.85            | 73.55         | 507.7          | Gly       |
| 3.90          | 3.91            | 0.080          | 22.29           | 225.27        | 1594.6         | β-Ala     |
| 4.20          | 4.21            | 0.075          | 7.17            | 77.17         | 513.7          | Arg       |
| 5.23          | 5.24            | 0.079          | 24.01           | 220.52        | 1255.8         | Pro       |
| 8.11          | 8.11            | 0.083          | 0.80            | 9.00          | 58.4           | Val       |
| 9.35          | 9.36            | 0.087          | 2.19            | 19.17         | 78.5           | C-        |
| 9.64          | 9.66            | 0.097          | 2.64            | 22.82         | 93.4           | C-C       |
| 10.94         | 10.96           | 0.112          | 8.65            | 58.94         | 750.8          | NH3       |
| <b>Total:</b> |                 |                | 111.121         | 1091.151      | 7092.16        |           |

**Hit 2a c(SYLPGEDCPq) and 2b c(SDYPGELCPq).**

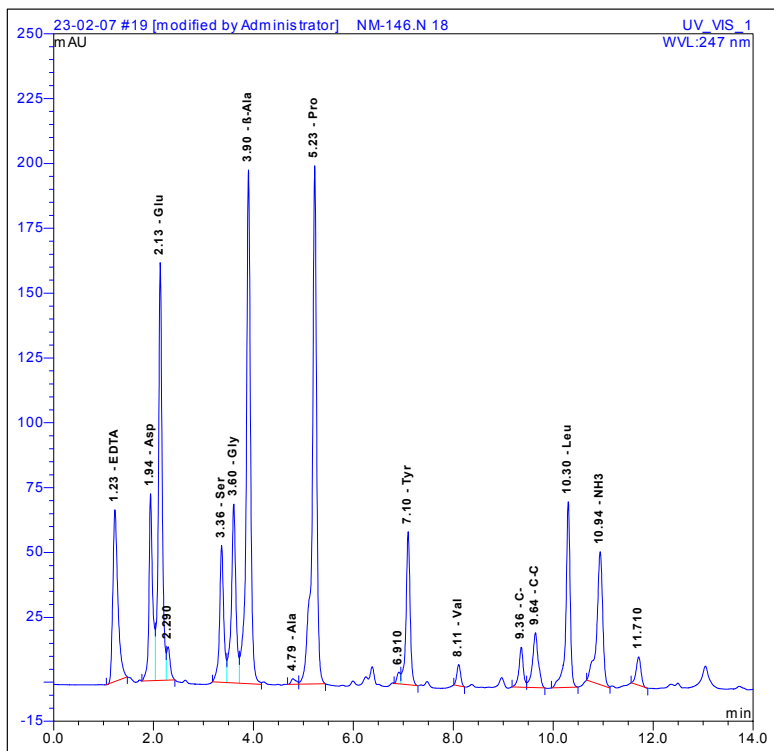

| RT<br>min     | RT (STD)<br>min | PW(50%)<br>min | Area<br>mAU*min | Height<br>mAU | Amount<br>pmol | Peak Name |
|---------------|-----------------|----------------|-----------------|---------------|----------------|-----------|
| 1.23          | 1.23            | 0.100          | 7.67            | 66.21         | 300.2          | EDTA      |
| 1.94          | 1.95            | 0.069          | 6.22            | 72.05         | 399.0          | Asp       |
| 2.13          | 2.14            | 0.073          | 13.97           | 160.97        | 979.0          | Glu       |
| 3.36          | 3.37            | 0.080          | 5.10            | 52.77         | 368.1          | Ser       |
| 3.60          | 3.61            | 0.086          | 7.37            | 68.93         | 475.9          | Gly       |
| 3.90          | 3.91            | 0.080          | 19.65           | 198.07        | 1402.0         | β-Ala     |
| 4.79          | 4.81            | 0.123          | 0.25            | 2.19          | 14.7           | Ala       |
| 5.23          | 5.24            | 0.079          | 20.80           | 199.73        | 1137.4         | Pro       |
| 7.10          | 7.11            | 0.079          | 5.58            | 58.95         | 399.6          | Tyr       |
| 8.11          | 8.11            | 0.083          | 0.72            | 8.14          | 52.8           | Val       |
| 9.36          | 9.36            | 0.083          | 1.54            | 15.43         | 63.1           | C-        |
| 9.64          | 9.66            | 0.111          | 2.83            | 21.13         | 86.5           | C-C       |
| 10.30         | 10.31           | 0.079          | 7.16            | 71.52         | 493.9          | Leu       |
| 10.94         | 10.96           | 0.112          | 7.09            | 51.23         | 652.6          | NH3       |
| <b>Total:</b> |                 |                | 105.954         | 1047.320      | 6824.82        |           |

**Hit 3a c(HITPGEDAPq) and 3b c(HDEPGIATPq).**

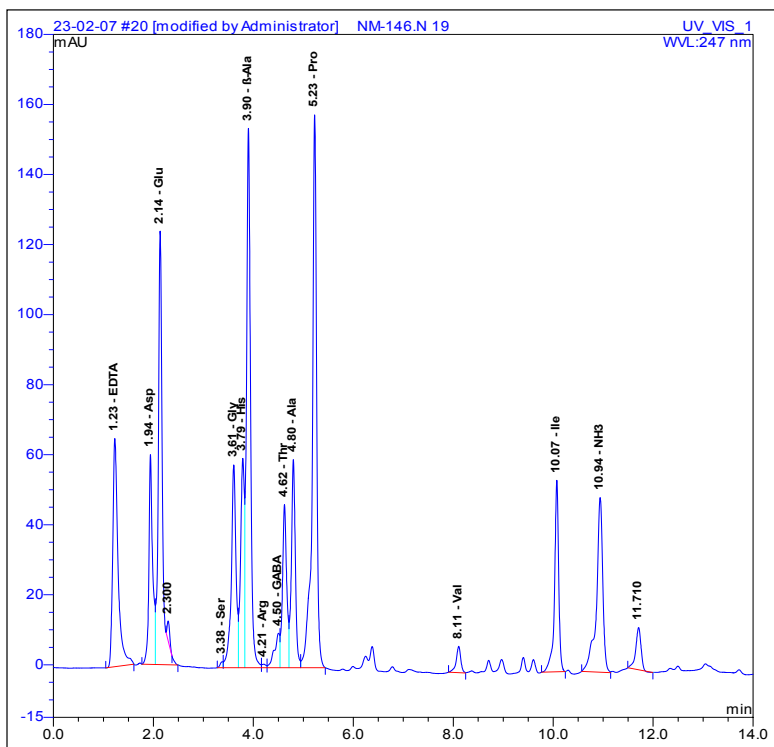

| RT<br>min     | RT (STD)<br>min | PW(50%)<br>min | Area<br>mAU*min | Height<br>mAU | Amount<br>pmol | Peak Name |
|---------------|-----------------|----------------|-----------------|---------------|----------------|-----------|
| 1.23          | 1.23            | 0.102          | 8.07            | 65.14         | 295.3          | EDTA      |
| 1.94          | 1.95            | 0.071          | 5.28            | 59.89         | 331.6          | Asp       |
| 2.14          | 2.14            | 0.074          | 11.67           | 123.78        | 752.8          | Glu       |
| 3.38          | 3.37            | n.a.           | 0.11            | 1.71          | 11.9           | Ser       |
| 3.61          | 3.61            | 0.089          | 6.34            | 57.89         | 399.6          | Gly       |
| 3.79          | 3.79            | n.a.           | 5.30            | 59.78         | 402.5          | His       |
| 3.90          | 3.91            | 0.084          | 14.45           | 154.00        | 1090.1         | β-Ala     |
| 4.21          | 4.21            | n.a.           | 0.09            | 1.01          | 6.7            | Arg       |
| 4.50          | 4.50            | n.a.           | 1.21            | 9.83          | 62.6           | GABA      |
| 4.62          | 4.63            | 0.088          | 4.61            | 46.57         | 370.0          | Thr       |
| 4.80          | 4.81            | 0.081          | 5.57            | 59.40         | 399.5          | Ala       |
| 5.23          | 5.24            | 0.079          | 16.14           | 157.83        | 898.8          | Pro       |
| 8.11          | 8.11            | 0.090          | 0.81            | 7.53          | 48.9           | Val       |
| 10.07         | 10.09           | 0.079          | 5.33            | 54.69         | 352.1          | Ile       |
| 10.94         | 10.96           | 0.113          | 7.36            | 49.83         | 634.8          | NH3       |
| <b>Total:</b> |                 |                | 92.349          | 908.893       | 6057.26        |           |

**Hit 4 c(VDEPGEDCPq).**

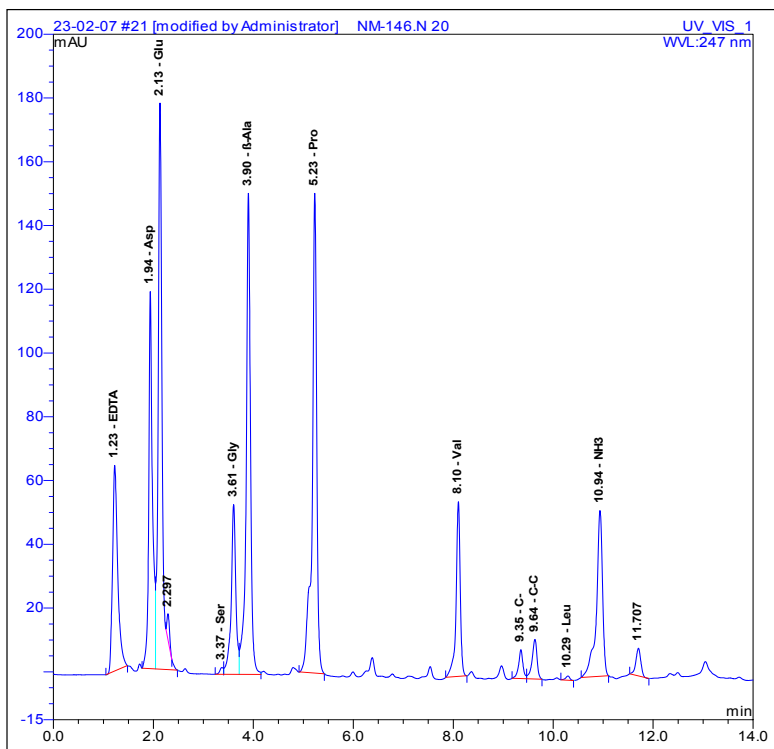

| RT<br>min     | RT (STD)<br>min | PW(50%)<br>min | Area<br>mAU*min | Height<br>mAU | Amount<br>pmol | Peak Name |
|---------------|-----------------|----------------|-----------------|---------------|----------------|-----------|
| 1.23          | 1.23            | 0.104          | 7.71            | 64.52         | 292.5          | EDTA      |
| 1.94          | 1.95            | 0.069          | 10.30           | 118.25        | 654.9          | Asp       |
| 2.13          | 2.14            | 0.074          | 16.55           | 177.57        | 1080.0         | Glu       |
| 3.37          | 3.37            | n.a.           | 0.17            | 2.13          | 14.9           | Ser       |
| 3.61          | 3.61            | 0.086          | 5.78            | 53.23         | 367.4          | Gly       |
| 3.90          | 3.91            | 0.081          | 15.15           | 150.88        | 1068.0         | β-Ala     |
| 5.23          | 5.24            | 0.079          | 15.83           | 150.47        | 856.9          | Pro       |
| 8.10          | 8.11            | 0.079          | 5.28            | 54.81         | 355.4          | Val       |
| 9.35          | 9.36            | 0.085          | 0.92            | 9.08          | 37.2           | C-        |
| 9.64          | 9.66            | 0.101          | 1.43            | 12.45         | 51.0           | C-C       |
| 10.29         | 10.31           | 0.084          | 0.13            | 1.33          | 9.2            | Leu       |
| 10.94         | 10.96           | 0.112          | 7.43            | 51.95         | 661.7          | NH3       |
| <b>Total:</b> |                 |                | 86.690          | 846.676       | 5449.08        |           |



**Hit 5 c(VCEPGE LTPq).**

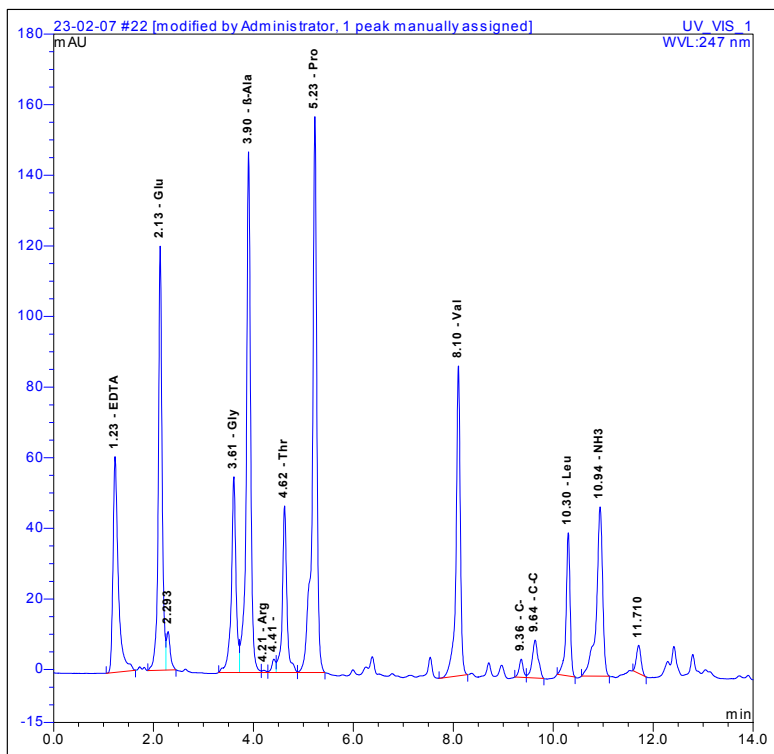

| RT<br>min     | RT (STD)<br>min | PW(50%)<br>min | Area<br>mAU*min | Height<br>mAU | Amount<br>pmol | Peak Name |
|---------------|-----------------|----------------|-----------------|---------------|----------------|-----------|
| 1.23          | 1.23            | 0.098          | 7.43            | 61.12         | 277.1          | EDTA      |
| 2.13          | 2.14            | 0.073          | 10.60           | 120.09        | 730.4          | Glu       |
| 3.61          | 3.61            | 0.085          | 6.00            | 55.45         | 382.8          | Gly       |
| 3.90          | 3.91            | 0.080          | 14.66           | 147.44        | 1043.7         | β-Ala     |
| 4.21          | 4.21            | n.a.           | 0.06            | 0.61          | 4.1            | Arg       |
| 4.62          | 4.63            | 0.081          | 4.93            | 47.15         | 374.6          | Thr       |
| 5.23          | 5.24            | 0.079          | 16.37           | 157.42        | 896.5          | Pro       |
| 8.10          | 8.11            | 0.079          | 8.66            | 87.72         | 568.9          | Val       |
| 9.36          | 9.36            | 0.082          | 0.49            | 5.17          | 21.2           | C-        |
| 9.64          | 9.66            | 0.121          | 1.50            | 10.74         | 44.0           | C-C       |
| 10.30         | 10.31           | 0.078          | 3.77            | 40.57         | 280.2          | Leu       |
| 10.94         | 10.96           | 0.113          | 6.99            | 47.94         | 610.6          | NH3       |
| <b>Total:</b> |                 |                | 81.456          | 781.425       | 5233.91        |           |

**Hit 6a c(VSEPGIDTPq) and 6b c(SIEPGVDTPq).**

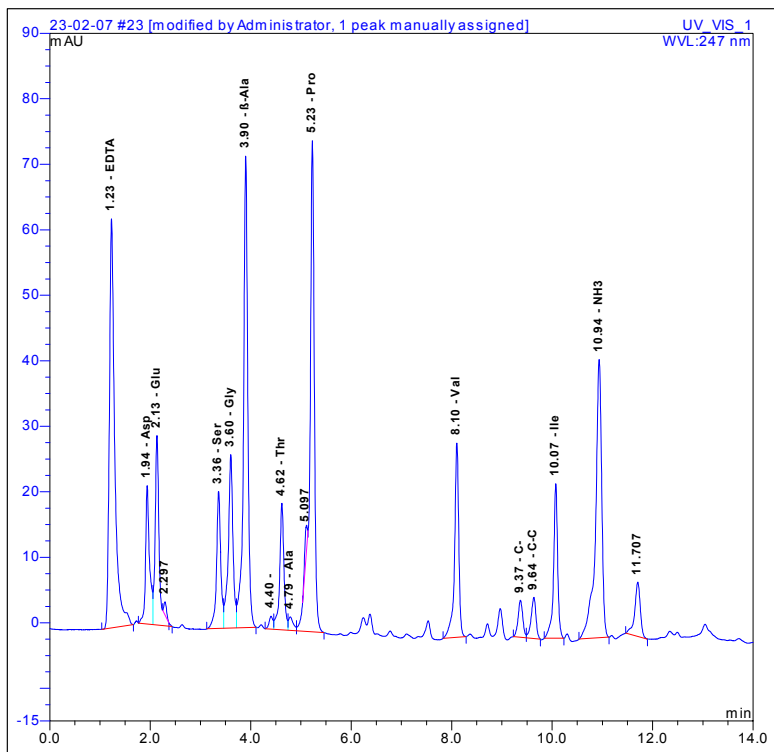

| RT<br>min     | RT (STD)<br>min | PW(50%)<br>min | Area<br>mAU*min | Height<br>mAU | Amount<br>pmol | Peak Name |
|---------------|-----------------|----------------|-----------------|---------------|----------------|-----------|
| 1.23          | 1.23            | 0.101          | 7.78            | 62.44         | 283.1          | EDTA      |
| 1.94          | 1.95            | 0.072          | 1.95            | 21.10         | 116.9          | Asp       |
| 2.13          | 2.14            | 0.074          | 2.68            | 28.89         | 175.7          | Glu       |
| 3.36          | 3.37            | 0.081          | 2.06            | 20.90         | 145.8          | Ser       |
| 3.60          | 3.61            | 0.087          | 2.89            | 26.49         | 182.9          | Gly       |
| 3.90          | 3.91            | 0.082          | 7.22            | 71.98         | 509.5          | β-Ala     |
| 4.62          | 4.63            | 0.081          | 1.93            | 19.31         | 153.4          | Thr       |
| 4.79          | 4.81            | n.a.           | 0.23            | 2.06          | 13.9           | Ala       |
| 5.23          | 5.24            | 0.080          | 8.10            | 74.96         | 426.9          | Pro       |
| 8.10          | 8.11            | 0.080          | 2.91            | 29.66         | 192.4          | Val       |
| 9.37          | 9.36            | 0.099          | 0.61            | 5.66          | 23.1           | C-        |
| 9.64          | 9.66            | 0.099          | 0.70            | 6.32          | 25.9           | C-C       |
| 10.07         | 10.09           | 0.079          | 2.26            | 23.59         | 151.8          | Ile       |
| 10.94         | 10.96           | 0.113          | 6.14            | 42.49         | 541.3          | NH3       |
| <b>Total:</b> |                 |                | 47.461          | 435.845       | 2942.45        |           |

**Hit 7a c(VSLPGEDAPq) and 7b c(SDEPGVLAPq).**

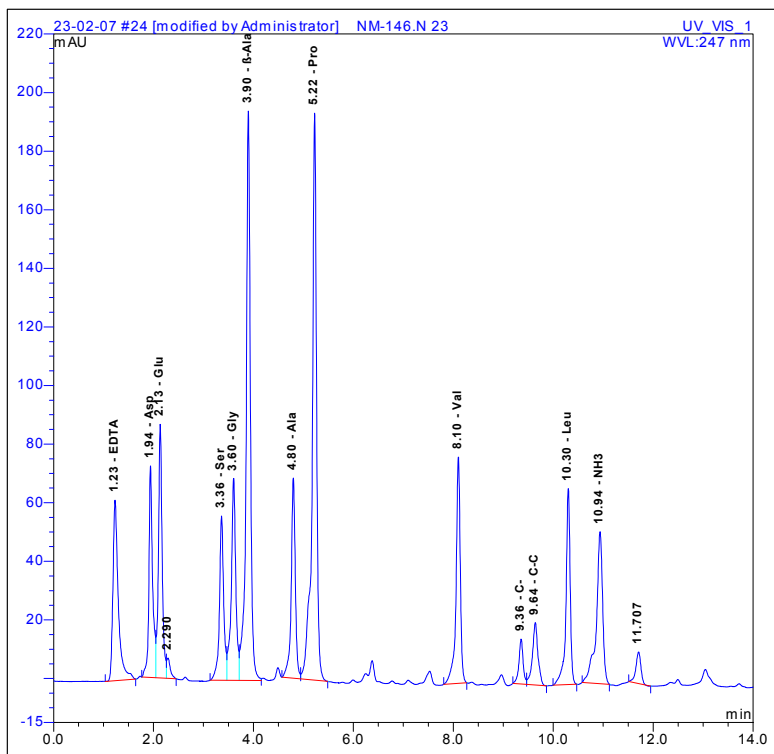

| RT<br>min     | RT (STD)<br>min | PW(50%)<br>min | Area<br>mAU*min | Height<br>mAU | Amount<br>pmol | Peak Name    |
|---------------|-----------------|----------------|-----------------|---------------|----------------|--------------|
| 1.23          | 1.23            | 0.101          | 7.67            | 61.59         | 279.2          | EDTA         |
| 1.94          | 1.95            | 0.069          | 6.27            | 72.22         | 400.0          | Asp          |
| 2.13          | 2.14            | 0.074          | 7.56            | 86.56         | 526.5          | Glu          |
| 3.36          | 3.37            | 0.081          | 5.54            | 56.04         | 390.9          | Ser          |
| 3.60          | 3.61            | 0.086          | 7.36            | 68.90         | 475.6          | Gly          |
| 3.90          | 3.91            | 0.080          | 19.39           | 194.33        | 1375.6         | $\beta$ -Ala |
| 4.80          | 4.81            | 0.080          | 6.55            | 68.31         | 459.5          | Ala          |
| 5.22          | 5.24            | 0.079          | 19.94           | 193.53        | 1102.1         | Pro          |
| 8.10          | 8.11            | 0.080          | 7.63            | 77.25         | 501.0          | Val          |
| 9.36          | 9.36            | 0.082          | 1.50            | 15.35         | 62.8           | C-           |
| 9.64          | 9.66            | 0.106          | 2.75            | 21.33         | 87.3           | C-C          |
| 10.30         | 10.31           | 0.079          | 6.58            | 66.90         | 462.0          | Leu          |
| 10.94         | 10.96           | 0.113          | 7.64            | 51.84         | 660.3          | NH3          |
| <b>Total:</b> |                 |                | 106.392         | 1034.155      | 6782.81        |              |

**Hit 8 c(VDEPGVDTPq).**

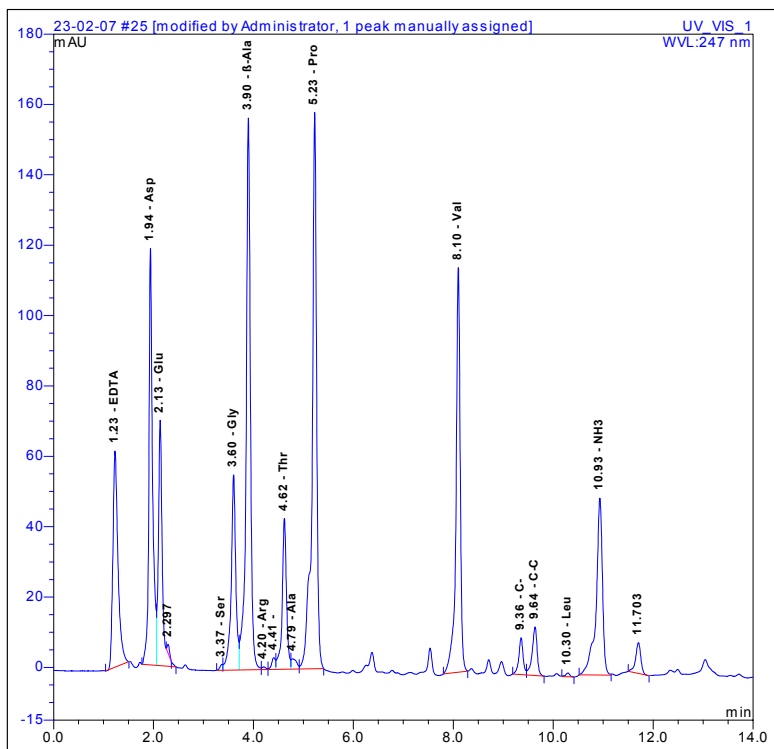

| RT<br>min     | RT (STD)<br>min | PW(50%)<br>min | Area<br>mAU*min | Height<br>mAU | Amount<br>pmol | Peak Name |
|---------------|-----------------|----------------|-----------------|---------------|----------------|-----------|
| 1.23          | 1.23            | 0.101          | 7.23            | 61.41         | 278.4          | EDTA      |
| 1.94          | 1.95            | 0.067          | 10.20           | 118.38        | 655.6          | Asp       |
| 2.13          | 2.14            | 0.075          | 6.40            | 69.76         | 424.2          | Glu       |
| 3.37          | 3.37            | n.a.           | 0.11            | 1.64          | 11.4           | Ser       |
| 3.60          | 3.61            | 0.086          | 5.99            | 55.42         | 382.6          | Gly       |
| 3.90          | 3.91            | 0.081          | 15.70           | 156.80        | 1109.9         | β-Ala     |
| 4.20          | 4.21            | n.a.           | 0.07            | 0.73          | 4.9            | Arg       |
| 4.62          | 4.63            | 0.082          | 4.31            | 42.83         | 340.3          | Thr       |
| 4.79          | 4.81            | n.a.           | 0.36            | 2.90          | 19.5           | Ala       |
| 5.23          | 5.24            | 0.079          | 16.63           | 158.07        | 900.2          | Pro       |
| 8.10          | 8.11            | 0.080          | 11.34           | 114.98        | 745.7          | Val       |
| 9.36          | 9.36            | 0.084          | 1.04            | 10.44         | 42.8           | C-        |
| 9.64          | 9.66            | 0.099          | 1.61            | 13.83         | 56.6           | C-C       |
| 10.30         | 10.31           | 0.082          | 0.10            | 1.10          | 7.6            | Leu       |
| 10.93         | 10.96           | 0.114          | 7.47            | 50.30         | 640.8          | NH3       |
| <b>Total:</b> |                 |                | 88.558          | 858.602       | 5620.45        |           |

**Hit 9a c(HCTPGELAPq) and 9b c(HCLPGEATPq).**

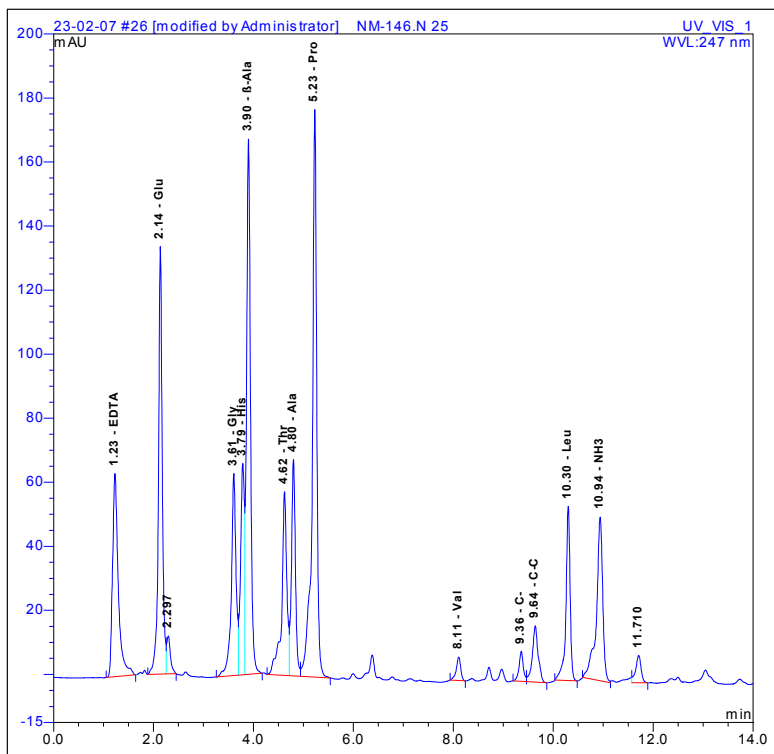

| RT<br>min     | RT (STD)<br>min | PW(50%)<br>min | Area<br>mAU*min | Height<br>mAU | Amount<br>pmol | Peak Name    |
|---------------|-----------------|----------------|-----------------|---------------|----------------|--------------|
| 1.23          | 1.23            | 0.112          | 8.47            | 63.47         | 287.7          | EDTA         |
| 2.14          | 2.14            | 0.073          | 11.91           | 133.47        | 811.7          | Glu          |
| 3.61          | 3.61            | 0.089          | 6.98            | 63.10         | 435.6          | Gly          |
| 3.79          | 3.79            | n.a.           | 5.81            | 65.97         | 444.1          | His          |
| 3.90          | 3.91            | 0.083          | 15.53           | 167.17        | 1183.3         | $\beta$ -Ala |
| 4.62          | 4.63            | 0.087          | 6.88            | 57.32         | 455.4          | Thr          |
| 4.80          | 4.81            | 0.081          | 6.22            | 67.49         | 453.9          | Ala          |
| 5.23          | 5.24            | 0.079          | 18.41           | 177.21        | 1009.2         | Pro          |
| 8.11          | 8.11            | 0.090          | 0.76            | 7.32          | 47.4           | Val          |
| 9.36          | 9.36            | 0.084          | 0.93            | 9.34          | 38.2           | C-           |
| 9.64          | 9.66            | 0.110          | 2.37            | 17.57         | 71.9           | C-C          |
| 10.30         | 10.31           | 0.079          | 5.30            | 54.38         | 375.6          | Leu          |
| 10.94         | 10.96           | 0.113          | 7.53            | 51.11         | 651.0          | NH3          |
| <b>Total:</b> |                 |                | 97.084          | 934.921       | 6265.19        |              |

**Hit 10 c(SIEPGEWCPq).**

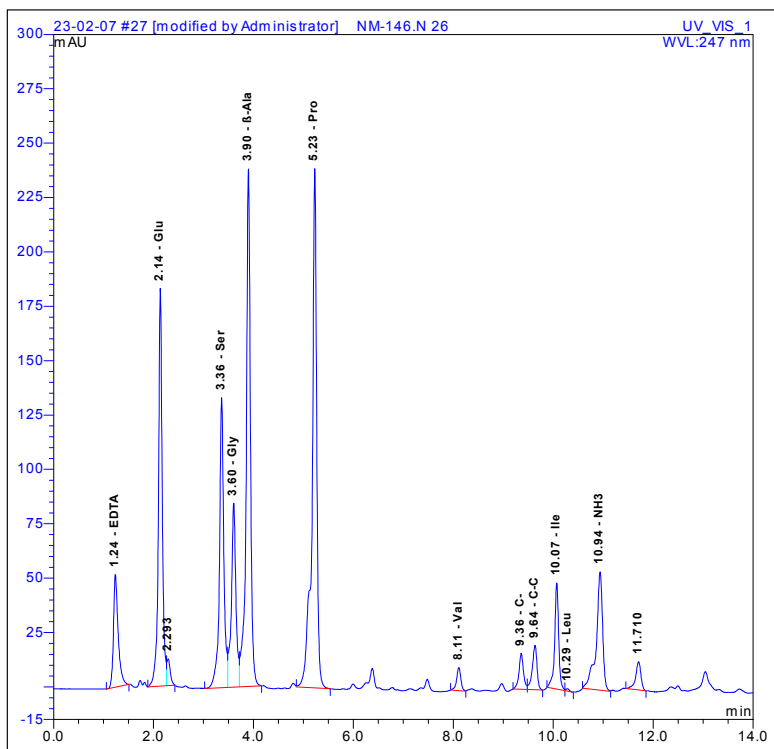

| RT<br>min     | RT (STD)<br>min | PW(50%)<br>min | Area<br>mAU*min | Height<br>mAU | Amount<br>pmol | Peak Name |
|---------------|-----------------|----------------|-----------------|---------------|----------------|-----------|
| 1.24          | 1.23            | 0.091          | 5.62            | 51.76         | 234.7          | EDTA      |
| 2.14          | 2.14            | 0.073          | 16.28           | 182.80        | 1111.8         | Glu       |
| 3.36          | 3.37            | 0.080          | 13.40           | 133.34        | 930.2          | Ser       |
| 3.60          | 3.61            | 0.086          | 9.04            | 84.50         | 583.3          | Gly       |
| 3.90          | 3.91            | 0.080          | 23.60           | 237.87        | 1683.8         | β-Ala     |
| 5.23          | 5.24            | 0.079          | 25.80           | 238.70        | 1359.3         | Pro       |
| 8.11          | 8.11            | 0.086          | 1.05            | 10.62         | 68.9           | Val       |
| 9.36          | 9.36            | 0.089          | 1.73            | 16.49         | 67.5           | C-        |
| 9.64          | 9.66            | 0.096          | 2.24            | 20.47         | 83.8           | C-C       |
| 10.07         | 10.09           | 0.078          | 4.58            | 48.77         | 314.0          | Ile       |
| 10.29         | 10.31           | 0.091          | 0.08            | 1.01          | 7.0            | Leu       |
| 10.94         | 10.96           | 0.113          | 8.12            | 54.35         | 692.3          | NH3       |
| <b>Total:</b> |                 |                | 111.544         | 1080.695      | 7136.49        |           |

**Hit 11 c(VIEPGEDCPq).**

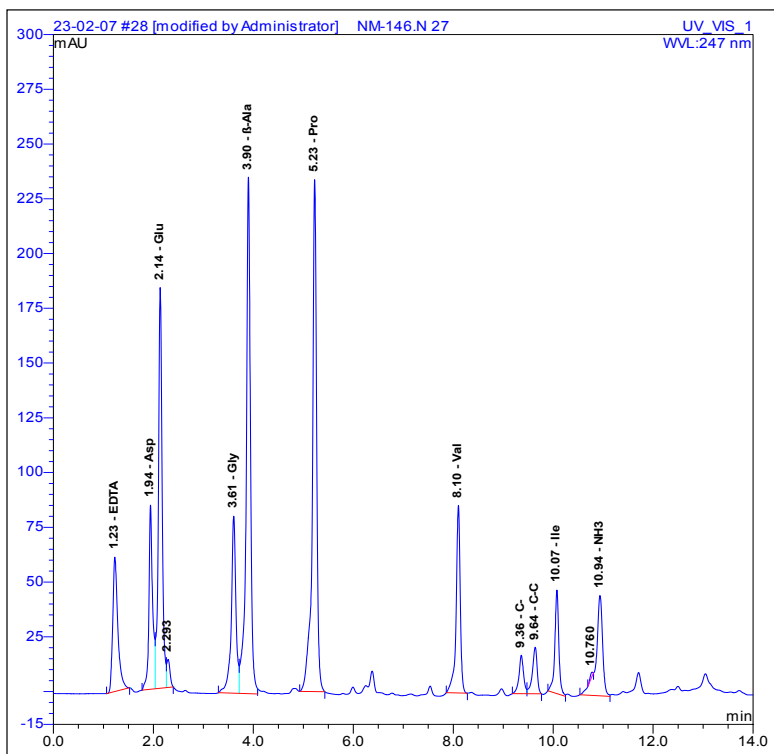

| RT<br>min     | RT (STD)<br>min | PW(50%)<br>min | Area<br>mAU*min | Height<br>mAU | Amount<br>pmol | Peak Name |
|---------------|-----------------|----------------|-----------------|---------------|----------------|-----------|
| 1.23          | 1.23            | 0.102          | 7.24            | 61.35         | 278.2          | EDTA      |
| 1.94          | 1.95            | 0.069          | 7.27            | 84.04         | 465.4          | Asp       |
| 2.14          | 2.14            | 0.073          | 15.97           | 182.92        | 1112.5         | Glu       |
| 3.61          | 3.61            | 0.086          | 8.81            | 80.86         | 558.2          | Gly       |
| 3.90          | 3.91            | 0.080          | 23.52           | 235.80        | 1669.1         | β-Ala     |
| 5.23          | 5.24            | 0.079          | 23.32           | 233.75        | 1331.1         | Pro       |
| 8.10          | 8.11            | 0.079          | 8.26            | 85.62         | 555.3          | Val       |
| 9.36          | 9.36            | 0.091          | 1.89            | 17.60         | 72.0           | C-        |
| 9.64          | 9.66            | 0.097          | 2.35            | 21.27         | 87.1           | C-C       |
| 10.07         | 10.09           | 0.078          | 4.44            | 47.28         | 304.4          | Ile       |
| 10.94         | 10.96           | 0.114          | 7.03            | 45.79         | 583.3          | NH3       |
| <b>Total:</b> |                 |                | 110.101         | 1096.276      | 7016.52        |           |

Hit 12 c(VIEPGEDAPq).

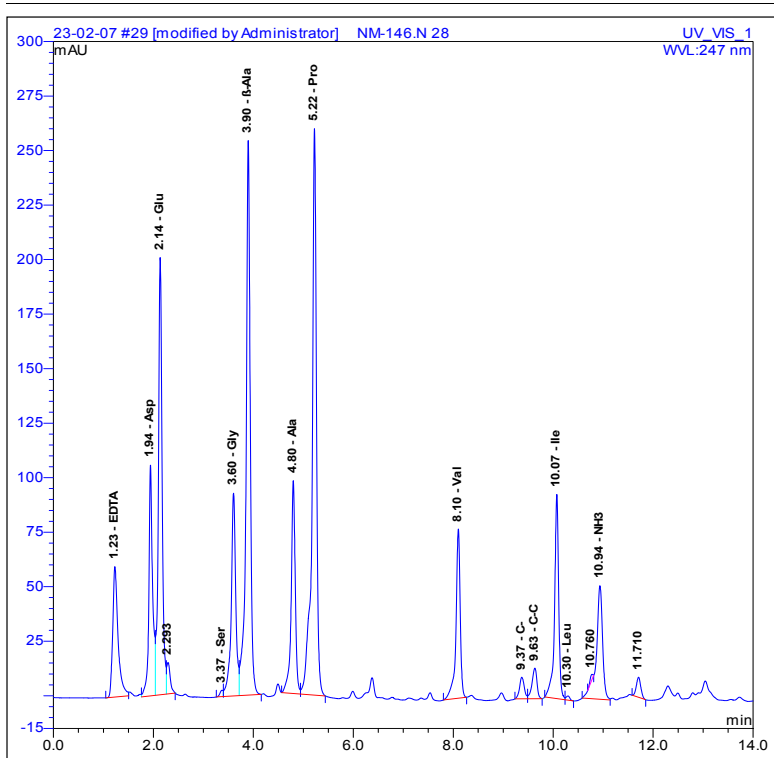

| RT<br>min     | RT (STD)<br>min | PW(50%)<br>min | Area<br>mAU*min | Height<br>mAU | Amount<br>pmol | Peak Name |
|---------------|-----------------|----------------|-----------------|---------------|----------------|-----------|
| 1.23          | 1.23            | 0.103          | 7.40            | 59.79         | 271.1          | EDTA      |
| 1.94          | 1.95            | 0.069          | 9.28            | 105.78        | 585.8          | Asp       |
| 2.14          | 2.14            | 0.073          | 17.51           | 200.46        | 1219.1         | Glu       |
| 3.37          | 3.37            | n.a.           | 0.21            | 2.92          | 20.4           | Ser       |
| 3.60          | 3.61            | 0.085          | 9.88            | 93.05         | 642.3          | Gly       |
| 3.90          | 3.91            | 0.079          | 24.94           | 254.33        | 1800.3         | β-Ala     |
| 4.80          | 4.81            | 0.079          | 9.33            | 97.58         | 656.3          | Ala       |
| 5.22          | 5.24            | 0.079          | 26.64           | 259.74        | 1479.1         | Pro       |
| 8.10          | 8.11            | 0.080          | 7.69            | 77.55         | 503.0          | Val       |
| 9.37          | 9.36            | 0.101          | 1.10            | 9.89          | 40.5           | C-        |
| 9.63          | 9.66            | 0.104          | 1.60            | 13.99         | 57.2           | C-C       |
| 10.07         | 10.09           | 0.079          | 9.11            | 93.61         | 602.6          | Ile       |
| 10.30         | 10.31           | 0.093          | 0.16            | 1.92          | 13.2           | Leu       |
| 10.94         | 10.96           | 0.114          | 7.73            | 52.08         | 663.4          | NH3       |
| <b>Total:</b> |                 |                | 132.594         | 1322.690      | 8554.44        |           |



**Hit 13a c(VDHPGEACPq), 13b c(HDEPGVACPq), 13c c(VCHPGEDAPq) and 13d c(HCEPGVDAPq).**

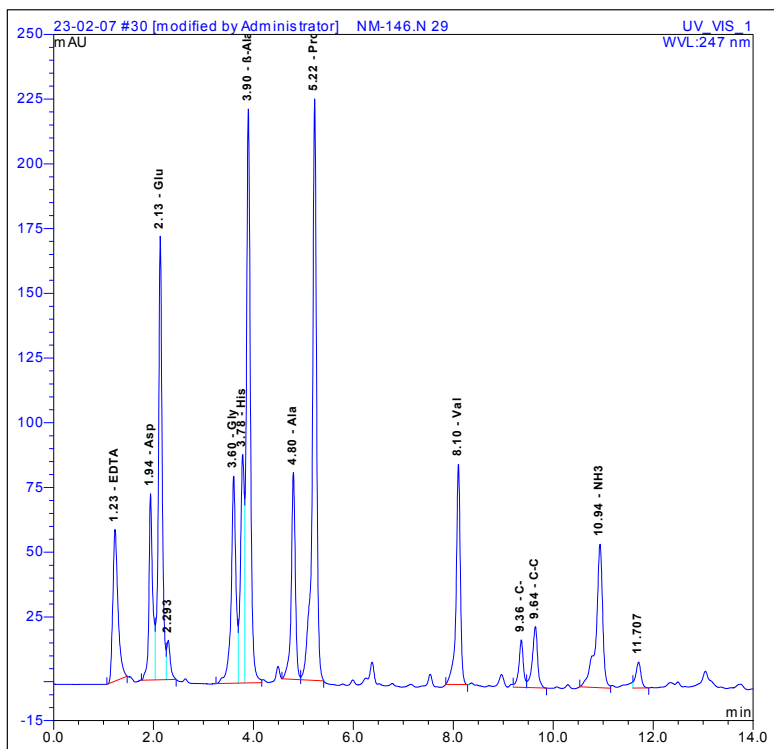

| RT<br>min     | RT (STD)<br>min | PW(50%)<br>min | Area<br>mAU*min | Height<br>mAU | Amount<br>pmol | Peak Name    |
|---------------|-----------------|----------------|-----------------|---------------|----------------|--------------|
| 1.23          | 1.23            | 0.103          | 6.97            | 58.54         | 265.4          | EDTA         |
| 1.94          | 1.95            | 0.070          | 6.30            | 71.94         | 398.4          | Asp          |
| 2.13          | 2.14            | 0.074          | 15.03           | 171.26        | 1041.6         | Glu          |
| 3.60          | 3.61            | 0.090          | 8.87            | 79.97         | 552.1          | Gly          |
| 3.78          | 3.79            | n.a.           | 7.92            | 88.26         | 594.2          | His          |
| 3.90          | 3.91            | 0.084          | 20.70           | 221.60        | 1568.6         | $\beta$ -Ala |
| 4.80          | 4.81            | 0.079          | 7.51            | 79.87         | 537.2          | Ala          |
| 5.22          | 5.24            | 0.079          | 22.41           | 224.58        | 1278.9         | Pro          |
| 8.10          | 8.11            | 0.080          | 8.34            | 85.07         | 551.7          | Val          |
| 9.36          | 9.36            | 0.086          | 1.92            | 18.36         | 75.2           | C-           |
| 9.64          | 9.66            | 0.103          | 2.91            | 23.69         | 97.0           | C-C          |
| 10.94         | 10.96           | 0.115          | 8.65            | 55.42         | 705.9          | NH3          |
| <b>Total:</b> |                 |                | 117.536         | 1178.568      | 7666.09        |              |

**Hit 14a c(VDLPGEACPq) and 14b c(VCLPGEDAPq).**

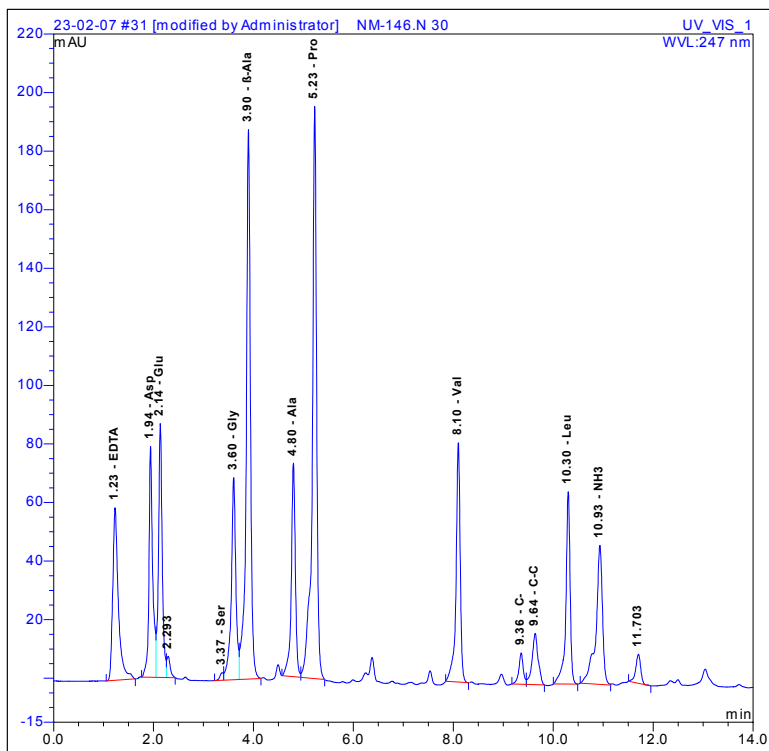

| RT<br>min     | RT (STD)<br>min | PW(50%)<br>min | Area<br>mAU*min | Height<br>mAU | Amount<br>pmol | Peak Name    |
|---------------|-----------------|----------------|-----------------|---------------|----------------|--------------|
| 1.23          | 1.23            | 0.107          | 7.69            | 58.95         | 267.2          | EDTA         |
| 1.94          | 1.95            | 0.069          | 6.88            | 78.80         | 436.4          | Asp          |
| 2.14          | 2.14            | 0.074          | 7.57            | 86.65         | 527.0          | Glu          |
| 3.37          | 3.37            | n.a.           | 0.21            | 2.55          | 17.8           | Ser          |
| 3.60          | 3.61            | 0.086          | 7.44            | 69.00         | 476.3          | Gly          |
| 3.90          | 3.91            | 0.080          | 18.65           | 187.48        | 1327.1         | $\beta$ -Ala |
| 4.80          | 4.81            | 0.079          | 6.92            | 72.91         | 490.4          | Ala          |
| 5.23          | 5.24            | 0.079          | 19.92           | 195.34        | 1112.4         | Pro          |
| 8.10          | 8.11            | 0.080          | 7.97            | 81.70         | 529.9          | Val          |
| 9.36          | 9.36            | 0.086          | 1.09            | 10.66         | 43.6           | C-           |
| 9.64          | 9.66            | 0.119          | 2.46            | 17.50         | 71.6           | C-C          |
| 10.30         | 10.31           | 0.080          | 6.52            | 65.65         | 453.4          | Leu          |
| 10.93         | 10.96           | 0.113          | 7.27            | 47.45         | 604.5          | NH3          |
| <b>Total:</b> |                 |                | 100.589         | 974.649       | 6357.62        |              |

**Hit 15a c(VSLPGEDCPq) and 15b c(SDEPGVLCpq).**

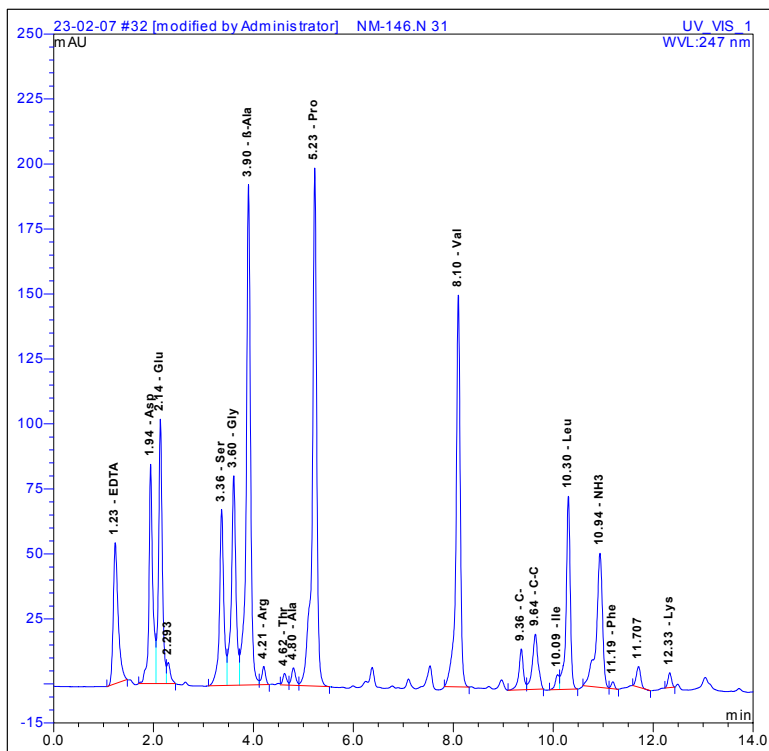

| RT<br>min | RT (STD)<br>min | PW(50%)<br>min | Area<br>mAU*min | Height<br>mAU | Amount<br>pmol | Peak Name |
|-----------|-----------------|----------------|-----------------|---------------|----------------|-----------|
| 1.23      | 1.23            | 0.095          | 6.09            | 54.19         | 245.7          | EDTA      |
| 1.94      | 1.95            | 0.068          | 7.49            | 84.34         | 467.1          | Asp       |
| 2.14      | 2.14            | 0.074          | 8.82            | 101.63        | 618.1          | Glu       |
| 3.36      | 3.37            | 0.081          | 6.82            | 67.79         | 472.9          | Ser       |
| 3.60      | 3.61            | 0.086          | 8.71            | 80.60         | 556.4          | Gly       |
| 3.90      | 3.91            | 0.080          | 19.27           | 192.53        | 1362.8         | β-Ala     |
| 4.21      | 4.21            | 0.077          | 0.61            | 7.03          | 46.8           | Arg       |
| 4.62      | 4.63            | 0.079          | 0.39            | 4.45          | 35.3           | Thr       |
| 4.80      | 4.81            | 0.084          | 0.64            | 6.75          | 45.4           | Ala       |
| 5.23      | 5.24            | 0.079          | 20.68           | 199.30        | 1135.0         | Pro       |
| 8.10      | 8.11            | 0.079          | 14.85           | 150.73        | 977.6          | Val       |
| 9.36      | 9.36            | 0.085          | 1.65            | 15.73         | 64.4           | C-        |
| 9.64      | 9.66            | 0.111          | 2.81            | 21.20         | 86.8           | C-C       |
| 10.09     | 10.09           | n.a.           | 0.53            | 5.73          | 36.9           | Ile       |
| 10.30     | 10.31           | 0.080          | 7.20            | 74.27         | 512.9          | Leu       |
| 10.94     | 10.96           | 0.112          | 7.54            | 51.65         | 657.9          | NH3       |
| 11.19     | 11.20           | 0.072          | 0.21            | 2.74          | 19.1           | Phe       |
| 12.33     | 12.34           | 0.077          | 0.46            | 5.65          | 22.0           | Lys       |

**Hit 16 c(VIEPGELTPq).**

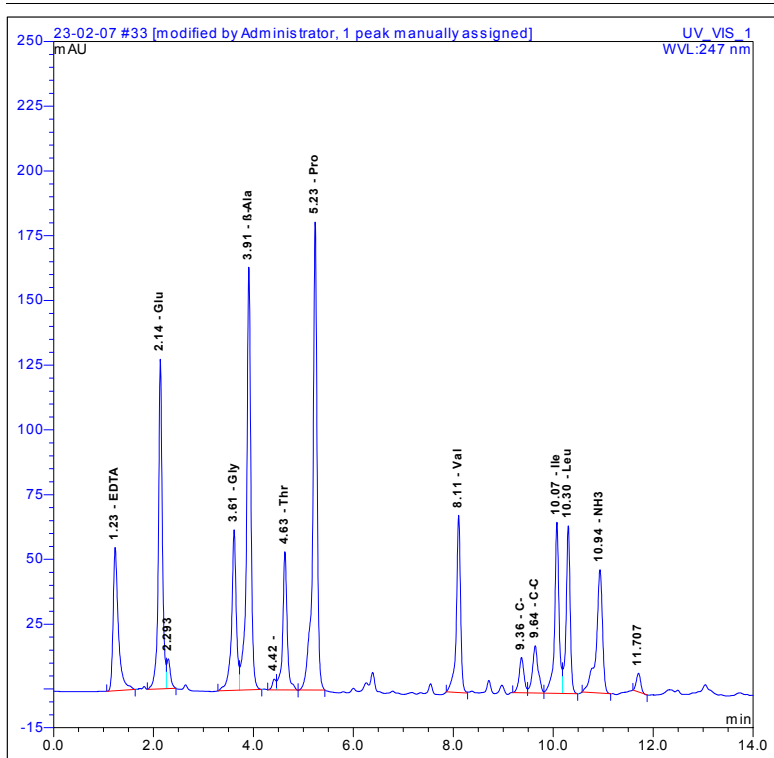

| RT<br>min     | RT (STD)<br>min | PW(50%)<br>min | Area<br>mAU*min | Height<br>mAU | Amount<br>pmol | Peak Name |
|---------------|-----------------|----------------|-----------------|---------------|----------------|-----------|
| 1.23          | 1.23            | 0.098          | 6.69            | 55.35         | 250.9          | EDTA      |
| 2.14          | 2.14            | 0.076          | 11.66           | 127.33        | 774.4          | Glu       |
| 3.61          | 3.61            | 0.086          | 6.81            | 61.96         | 427.8          | Gly       |
| 3.91          | 3.91            | 0.080          | 16.23           | 163.23        | 1155.4         | β-Ala     |
| 4.63          | 4.63            | 0.081          | 5.49            | 53.32         | 423.7          | Thr       |
| 5.23          | 5.24            | 0.078          | 18.12           | 180.71        | 1029.1         | Pro       |
| 8.11          | 8.11            | 0.079          | 6.68            | 68.48         | 444.1          | Val       |
| 9.36          | 9.36            | 0.099          | 1.52            | 13.59         | 55.6           | C-        |
| 9.64          | 9.66            | 0.111          | 2.40            | 18.23         | 74.6           | C-C       |
| 10.07         | 10.09           | 0.081          | 6.76            | 66.02         | 425.0          | Ile       |
| 10.30         | 10.31           | 0.080          | 6.07            | 64.76         | 447.2          | Leu       |
| 10.94         | 10.96           | 0.112          | 6.98            | 47.61         | 606.5          | NH3       |
| <b>Total:</b> |                 |                | 95.427          | 920.594       | 6114.37        |           |

**Hit 17a c(VSYPGEACPq) and 17b c(SYEPGVACPq).**

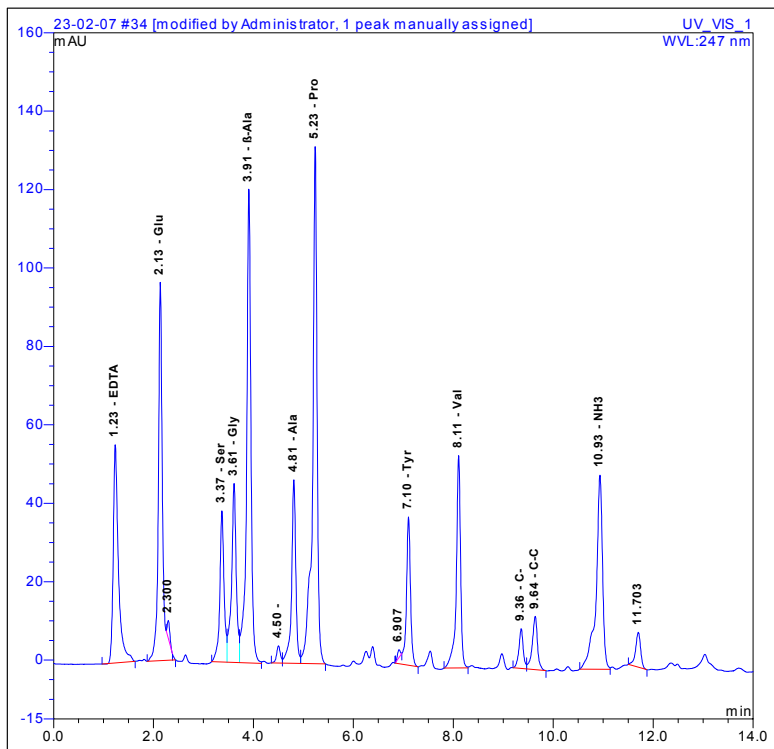

| RT<br>min     | RT (STD)<br>min | PW(50%)<br>min | Area<br>mAU*min | Height<br>mAU | Amount<br>pmol | Peak Name |
|---------------|-----------------|----------------|-----------------|---------------|----------------|-----------|
| 1.23          | 1.23            | 0.096          | 6.68            | 55.68         | 252.4          | EDTA      |
| 2.13          | 2.14            | 0.076          | 9.44            | 96.46         | 586.7          | Glu       |
| 3.37          | 3.37            | 0.082          | 3.84            | 38.55         | 268.9          | Ser       |
| 3.61          | 3.61            | 0.088          | 5.05            | 45.64         | 315.1          | Gly       |
| 3.91          | 3.91            | 0.081          | 12.24           | 120.79        | 855.0          | β-Ala     |
| 4.81          | 4.81            | 0.079          | 4.58            | 46.74         | 314.4          | Ala       |
| 5.23          | 5.24            | 0.078          | 13.93           | 131.86        | 750.9          | Pro       |
| 7.10          | 7.11            | 0.079          | 3.73            | 37.81         | 256.3          | Tyr       |
| 8.11          | 8.11            | 0.080          | 5.39            | 54.16         | 351.3          | Val       |
| 9.36          | 9.36            | 0.086          | 1.01            | 10.12         | 41.4           | C-        |
| 9.64          | 9.66            | 0.102          | 1.64            | 13.58         | 55.6           | C-C       |
| 10.93         | 10.96           | 0.113          | 7.49            | 49.49         | 630.4          | NH3       |
| <b>Total:</b> |                 |                | 75.019          | 700.889       | 4678.35        |           |

**Hit 18a c(VILPGEDCPq) and 18b c(VDEPGILCPq).**

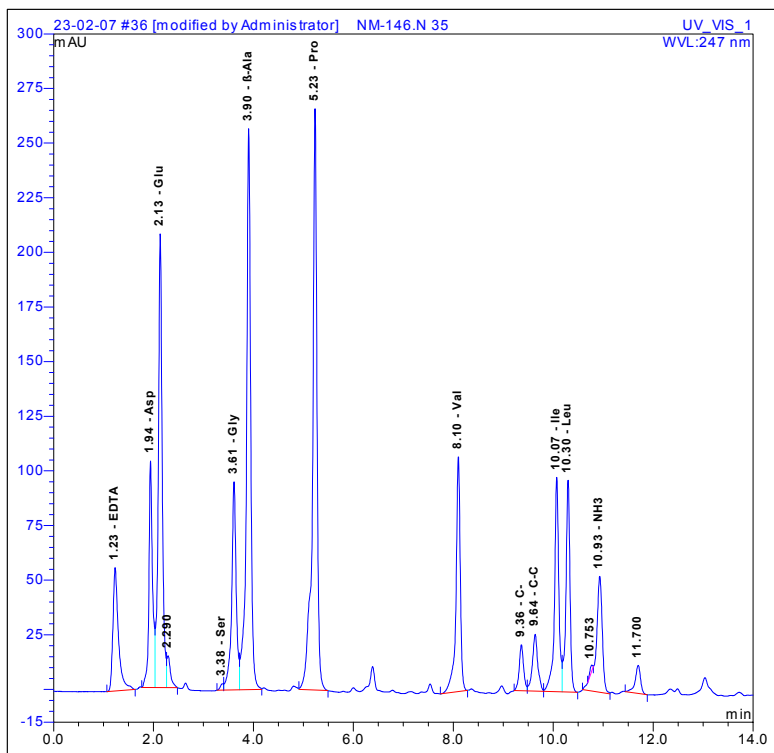

| RT<br>min     | RT (STD)<br>min | PW(50%)<br>min | Area<br>mAU*min | Height<br>mAU | Amount<br>pmol | Peak Name    |
|---------------|-----------------|----------------|-----------------|---------------|----------------|--------------|
| 1.23          | 1.23            | 0.104          | 7.22            | 56.46         | 255.9          | EDTA         |
| 1.94          | 1.95            | 0.068          | 8.74            | 103.62        | 573.8          | Asp          |
| 2.13          | 2.14            | 0.077          | 19.04           | 207.52        | 1262.1         | Glu          |
| 3.38          | 3.37            | n.a.           | 0.22            | 2.94          | 20.5           | Ser          |
| 3.61          | 3.61            | 0.085          | 10.19           | 95.26         | 657.6          | Gly          |
| 3.90          | 3.91            | 0.079          | 25.33           | 256.65        | 1816.7         | $\beta$ -Ala |
| 5.23          | 5.24            | 0.079          | 27.67           | 266.04        | 1515.0         | Pro          |
| 8.10          | 8.11            | 0.080          | 10.71           | 107.41        | 696.6          | Val          |
| 9.36          | 9.36            | 0.089          | 2.14            | 21.04         | 86.1           | C-           |
| 9.64          | 9.66            | 0.104          | 3.25            | 26.02         | 106.5          | C-C          |
| 10.07         | 10.09           | 0.081          | 10.05           | 98.16         | 631.9          | Ile          |
| 10.30         | 10.31           | 0.080          | 9.10            | 96.95         | 669.6          | Leu          |
| 10.93         | 10.96           | 0.113          | 7.77            | 53.08         | 676.1          | NH3          |
| <b>Total:</b> |                 |                | 141.433         | 1391.136      | 8968.54        |              |

**Table S1.** Non-Hits from cyclodecapeptide library X<sup>10</sup>X<sup>9</sup>X<sup>8</sup>Pro-Gly-X<sup>3</sup>X<sup>5</sup>X<sup>4</sup>-Pro-gln.

|           | X <sup>10</sup> | X <sup>9</sup> | X <sup>8</sup> | X <sup>5</sup> | X <sup>4</sup> | X <sup>3</sup> |
|-----------|-----------------|----------------|----------------|----------------|----------------|----------------|
| <b>1</b>  | Val             | Ser            | Thr            | Glu            | Leu            | Phe            |
| <b>2</b>  | Val             | Ile            | Thr            | Arg            | Arg            | Ala            |
| <b>3a</b> | Val             | Ser            | Tyr            | Ile            | Trp            | Phe            |
| <b>3b</b> | Ser             | Ile            | Tyr            | Val            | Trp            | Phe            |
| <b>4a</b> | Phe             | Ile            | Leu            | Glu            | Asp            | Phe            |
| <b>4b</b> | Phe             | Asp            | Glu            | Ile            | Leu            | Phe            |
| <b>5</b>  | Phe             | Ser            | Leu            | Val            | Trp            | Phe            |
| <b>6a</b> | Val             | Ser            | Tyr            | Ile            | Arg            | Thr            |
| <b>6b</b> | Ser             | Ile            | Tyr            | Val            | Arg            | Thr            |
| <b>7</b>  | Phe             | Ile            | Leu            | Lys            | Leu            | Phe            |

**Table S2.** Non-Hits percentage occurrence of the amino acid at the given position.

|    | AA  | X <sup>10</sup> | X <sup>9</sup> | X <sup>8</sup> | X <sup>5</sup> | X <sup>4</sup> | X <sup>3</sup> |
|----|-----|-----------------|----------------|----------------|----------------|----------------|----------------|
| 1  | Tyr |                 | 0%             | 29%            |                |                |                |
| 2  | His | 0%              |                | 0%             |                |                |                |
| 3  | Phe | 43%             |                |                |                |                | 71%            |
| 4  | Cys |                 | 0%             |                |                |                | 0%             |
| 5  | Glu |                 |                | 7%             | 21%            |                |                |
| 6  | Ile |                 | 50%            |                | 21%            |                |                |
| 7  | Lys |                 |                |                | 14%            |                | 0%             |
| 8  | Asp |                 | 7%             |                |                | 7%             |                |
| 9  | Ser | 14%             | 43%            |                |                |                |                |
| 10 | Val | 43%             |                |                | 29%            |                |                |
| 11 | Ala |                 |                |                |                | 0%             | 14%            |
| 12 | Leu |                 |                | 36%            |                | 36%            |                |
| 13 | Thr |                 |                | 29%            |                |                | 14%            |
| 14 | Trp | 0%              |                |                |                | 29%            |                |
| 15 | Arg |                 |                |                | 14%            | 29%            |                |

5. Amino acid analysis of non-hits in Table S1

**N1 c(VSTPGELFPq).**

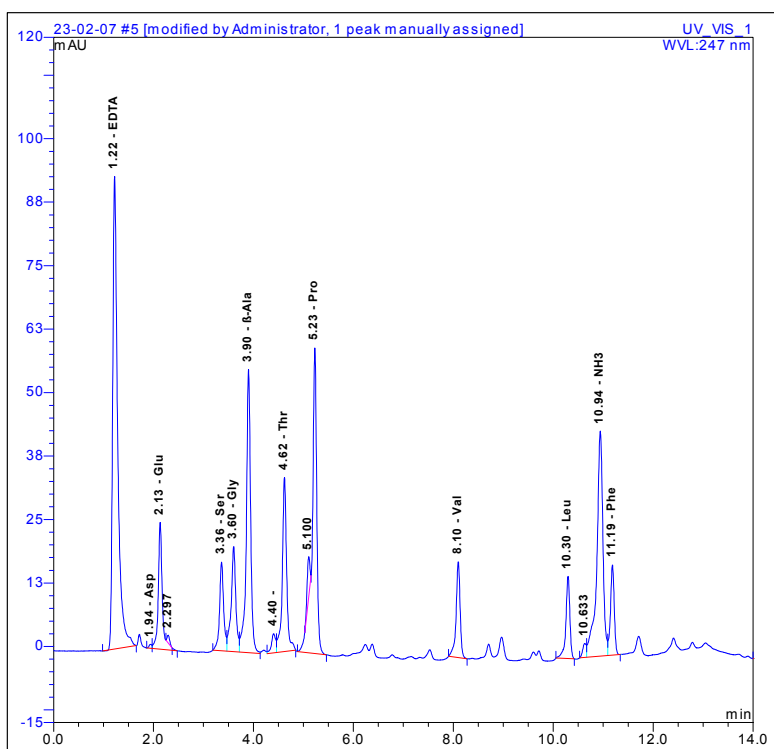

| RT<br>min     | RT (STD)<br>min | PW(50%)<br>min | Area<br>mAU*min | Height<br>mAU | Amount<br>pmol | Peak Name    |
|---------------|-----------------|----------------|-----------------|---------------|----------------|--------------|
| 1.22          | 1.23            | 0.096          | 10.79           | 93.07         | 422.0          | EDTA         |
| 1.94          | 1.95            | n.a.           | 0.05            | 0.78          | 4.3            | Asp          |
| 2.13          | 2.14            | 0.073          | 2.36            | 24.95         | 151.7          | Glu          |
| 3.36          | 3.37            | 0.079          | 1.66            | 17.46         | 121.8          | Ser          |
| 3.60          | 3.61            | 0.087          | 2.26            | 20.68         | 142.8          | Gly          |
| 3.90          | 3.91            | 0.081          | 5.60            | 55.74         | 394.6          | $\beta$ -Ala |
| 4.62          | 4.63            | 0.081          | 3.49            | 34.29         | 272.4          | Thr          |
| 5.23          | 5.24            | 0.079          | 6.71            | 60.17         | 342.6          | Pro          |
| 8.10          | 8.11            | 0.079          | 1.76            | 18.86         | 122.3          | Val          |
| 10.30         | 10.31           | 0.078          | 1.50            | 16.18         | 111.8          | Leu          |
| 10.94         | 10.96           | 0.113          | 6.36            | 44.30         | 564.3          | NH3          |
| 11.19         | 11.20           | 0.079          | 1.57            | 17.77         | 123.6          | Phe          |
| <b>Total:</b> |                 |                | 44.105          | 404.265       | 2774.24        |              |



**N2 c(VITPGRRAPq).**

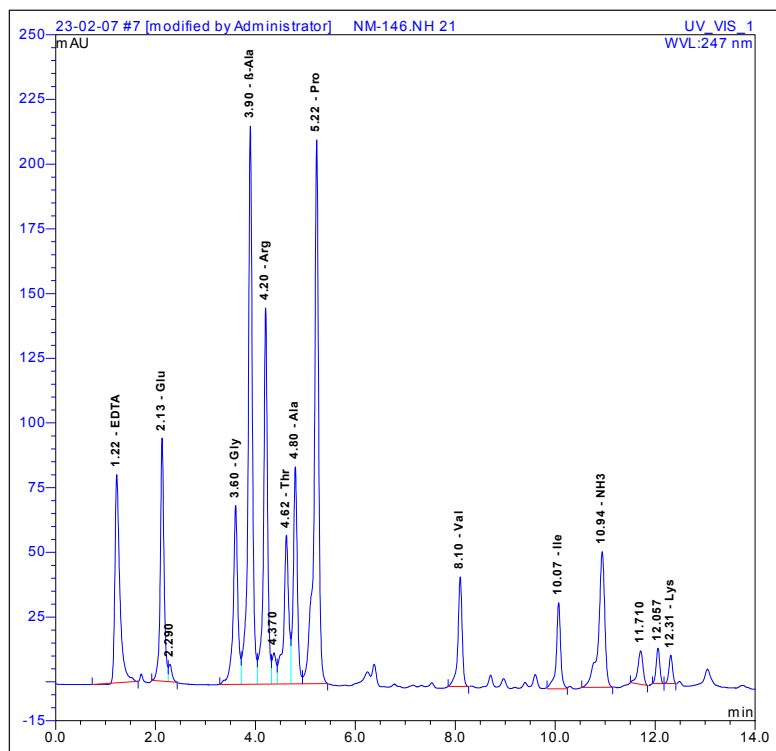

| RT<br>min     | RT (STD)<br>min | PW(50%)<br>min | Area<br>mAU*min | Height<br>mAU | Amount<br>pmol | Peak Name |
|---------------|-----------------|----------------|-----------------|---------------|----------------|-----------|
| 1.22          | 1.23            | 0.094          | 9.08            | 80.44         | 364.7          | EDTA      |
| 2.13          | 2.14            | 0.073          | 8.14            | 93.88         | 571.0          | Glu       |
| 3.60          | 3.61            | 0.085          | 7.42            | 68.98         | 476.2          | Gly       |
| 3.90          | 3.91            | 0.079          | 21.23           | 215.58        | 1526.0         | β-Ala     |
| 4.20          | 4.21            | 0.075          | 13.56           | 145.26        | 967.0          | Arg       |
| 4.62          | 4.63            | 0.090          | 6.73            | 57.39         | 456.0          | Thr       |
| 4.80          | 4.81            | 0.081          | 7.76            | 83.78         | 563.5          | Ala       |
| 5.22          | 5.24            | 0.079          | 21.95           | 210.09        | 1196.4         | Pro       |
| 8.10          | 8.11            | 0.081          | 4.15            | 42.31         | 274.4          | Val       |
| 10.07         | 10.09           | 0.080          | 3.40            | 33.31         | 214.4          | Ile       |
| 10.94         | 10.96           | 0.113          | 7.75            | 52.34         | 666.8          | NH3       |
| 12.31         | 12.34           | 0.078          | 0.91            | 10.90         | 42.4           | Lys       |
| <b>Total:</b> |                 |                | 112.083         | 1094.265      | 7318.72        |           |

**N3a c(VSYPGIWFPq) and N3b c(SIYPGVWFPq).**

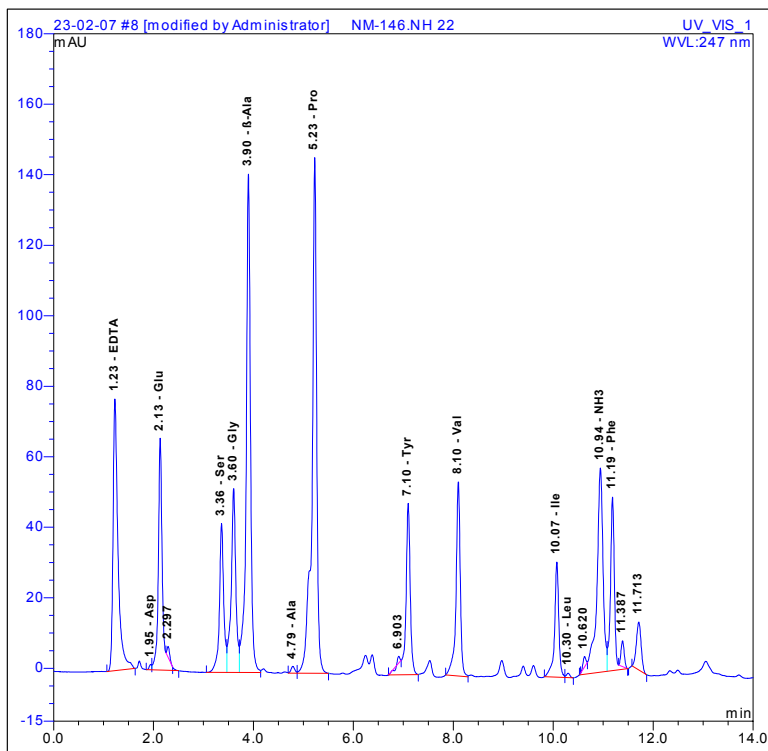

| RT<br>min     | RT (STD)<br>min | PW(50%)<br>min | Area<br>mAU*min | Height<br>mAU  | Amount<br>pmol | Peak Name |
|---------------|-----------------|----------------|-----------------|----------------|----------------|-----------|
| 1.23          | 1.23            | 0.093          | 8.80            | 77.01          | 349.1          | EDTA      |
| 1.95          | 1.95            | n.a.           | 0.08            | 1.49           | 8.2            | Asp       |
| 2.13          | 2.14            | 0.073          | 6.21            | 65.77          | 400.0          | Glu       |
| 3.36          | 3.37            | 0.081          | 4.25            | 42.26          | 294.8          | Ser       |
| 3.60          | 3.61            | 0.087          | 5.69            | 52.13          | 359.9          | Gly       |
| 3.90          | 3.91            | 0.081          | 14.19           | 141.41         | 1001.0         | β-Ala     |
| 4.79          | 4.81            | 0.081          | 0.17            | 1.95           | 13.1           | Ala       |
| 5.23          | 5.24            | 0.079          | 15.91           | 146.29         | 833.1          | Pro       |
| 7.10          | 7.11            | 0.080          | 5.21            | 48.57          | 329.2          | Tyr       |
| 8.10          | 8.11            | 0.080          | 5.43            | 55.08          | 357.2          | Val       |
| 10.07         | 10.09           | 0.079          | 3.20            | 32.62          | 210.0          | Ile       |
| 10.30         | 10.31           | 0.077          | 0.10            | 1.23           | 8.5            | Leu       |
| 10.94         | 10.96           | 0.113          | 8.57            | 57.92          | 737.7          | NH3       |
| 11.19         | 11.20           | 0.079          | 4.58            | 49.18          | 342.0          | Phe       |
| <b>Total:</b> |                 |                | <b>82.411</b>   | <b>772.915</b> | <b>5243.93</b> |           |

**N4a c(FILPGEDFPq) and N4b c(FDEPGILFPq).**

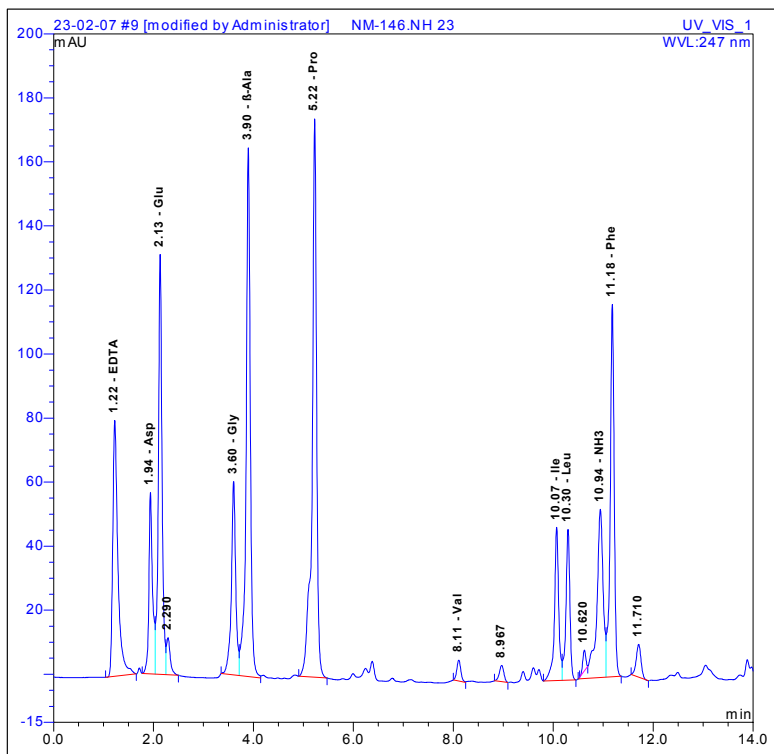

| RT<br>min     | RT (STD)<br>min | PW(50%)<br>min | Area<br>mAU*min | Height<br>mAU | Amount<br>pmol | Peak Name |
|---------------|-----------------|----------------|-----------------|---------------|----------------|-----------|
| 1.22          | 1.23            | 0.098          | 9.54            | 79.92         | 362.3          | EDTA      |
| 1.94          | 1.95            | 0.069          | 4.84            | 56.58         | 313.4          | Asp       |
| 2.13          | 2.14            | 0.073          | 11.33           | 131.09        | 797.3          | Glu       |
| 3.60          | 3.61            | 0.083          | 6.16            | 60.34         | 416.6          | Gly       |
| 3.90          | 3.91            | 0.079          | 16.20           | 165.07        | 1168.5         | β-Ala     |
| 5.22          | 5.24            | 0.079          | 18.18           | 174.31        | 992.6          | Pro       |
| 8.11          | 8.11            | 0.085          | 0.61            | 6.54          | 42.4           | Val       |
| 10.07         | 10.09           | 0.080          | 4.80            | 47.85         | 308.0          | Ile       |
| 10.30         | 10.31           | 0.079          | 4.32            | 47.05         | 324.9          | Leu       |
| 10.94         | 10.96           | 0.118          | 8.12            | 52.54         | 669.2          | NH3       |
| 11.18         | 11.20           | 0.080          | 10.86           | 116.27        | 808.6          | Phe       |
| <b>Total:</b> |                 |                | 94.962          | 937.572       | 6203.82        |           |

**N5 c(FSLPGVWFPq).**

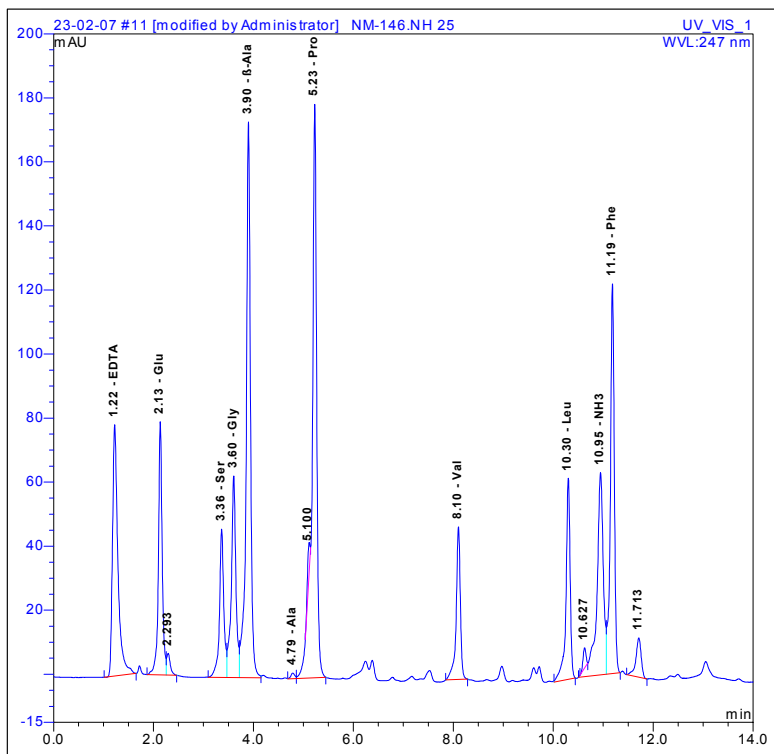

| RT<br>min     | RT (STD)<br>min | PW(50%)<br>min | Area<br>mAU*min | Height<br>mAU | Amount<br>pmol | Peak Name |
|---------------|-----------------|----------------|-----------------|---------------|----------------|-----------|
| 1.22          | 1.23            | 0.104          | 9.81            | 78.42         | 355.5          | EDTA      |
| 2.13          | 2.14            | 0.073          | 7.00            | 79.08         | 480.9          | Glu       |
| 3.36          | 3.37            | 0.081          | 4.67            | 46.32         | 323.1          | Ser       |
| 3.60          | 3.61            | 0.086          | 6.81            | 62.96         | 434.7          | Gly       |
| 3.90          | 3.91            | 0.080          | 17.32           | 173.50        | 1228.1         | β-Ala     |
| 4.79          | 4.81            | 0.083          | 0.16            | 1.75          | 11.8           | Ala       |
| 5.23          | 5.24            | 0.079          | 19.61           | 179.07        | 1019.7         | Pro       |
| 8.10          | 8.11            | 0.079          | 4.64            | 47.70         | 309.4          | Val       |
| 10.30         | 10.31           | 0.078          | 6.11            | 62.78         | 433.6          | Leu       |
| 10.95         | 10.96           | 0.116          | 9.57            | 63.13         | 804.2          | NH3       |
| 11.19         | 11.20           | 0.079          | 11.18           | 121.63        | 845.8          | Phe       |
| <b>Total:</b> |                 |                | 96.861          | 916.335       | 6246.73        |           |

**N6a c(VSYPGIRTPq) and N6b c(SIYPGVRTPq).**

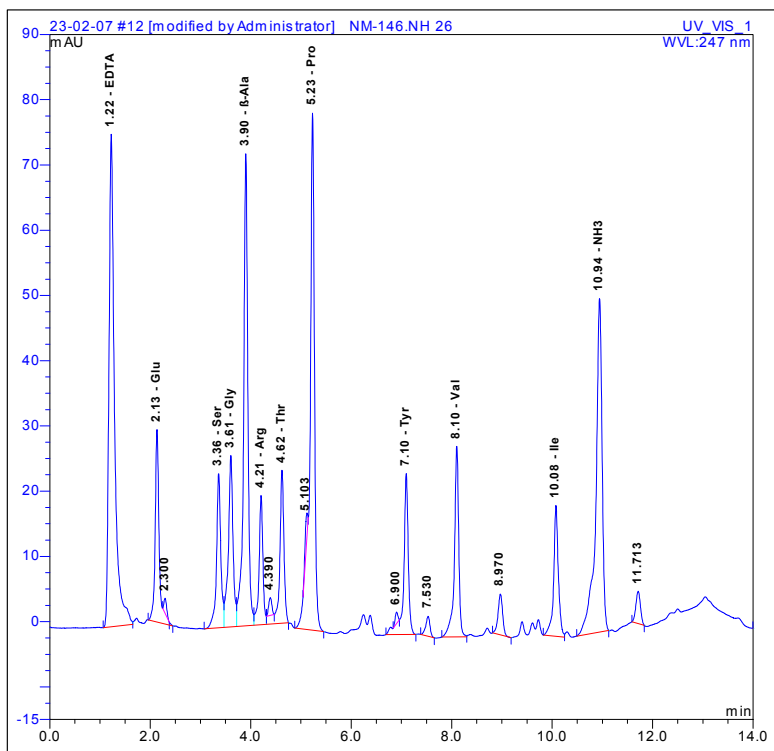

| RT<br>min     | RT (STD)<br>min | PW(50%)<br>min | Area<br>mAU*min | Height<br>mAU | Amount<br>pmol | Peak Name |
|---------------|-----------------|----------------|-----------------|---------------|----------------|-----------|
| 1.22          | 1.23            | 0.107          | 9.80            | 75.46         | 342.1          | EDTA      |
| 2.13          | 2.14            | 0.073          | 2.72            | 29.49         | 179.4          | Glu       |
| 3.36          | 3.37            | 0.081          | 2.35            | 23.61         | 164.7          | Ser       |
| 3.61          | 3.61            | 0.087          | 2.88            | 26.28         | 181.4          | Gly       |
| 3.90          | 3.91            | 0.081          | 7.24            | 72.35         | 512.1          | β-Ala     |
| 4.21          | 4.21            | 0.074          | 1.77            | 19.81         | 131.9          | Arg       |
| 4.62          | 4.63            | 0.079          | 2.40            | 23.44         | 186.3          | Thr       |
| 5.23          | 5.24            | 0.079          | 8.53            | 79.24         | 451.3          | Pro       |
| 7.10          | 7.11            | 0.080          | 2.67            | 24.67         | 167.2          | Tyr       |
| 8.10          | 8.11            | 0.080          | 2.95            | 29.23         | 189.6          | Val       |
| 10.08         | 10.09           | 0.087          | 2.19            | 20.07         | 129.2          | Ile       |
| 10.94         | 10.96           | 0.112          | 7.46            | 51.09         | 650.8          | NH3       |
| <b>Total:</b> |                 |                | 52.967          | 474.738       | 3285.83        |           |

**N7 c(FILPGKLFp<sub>q</sub>).**

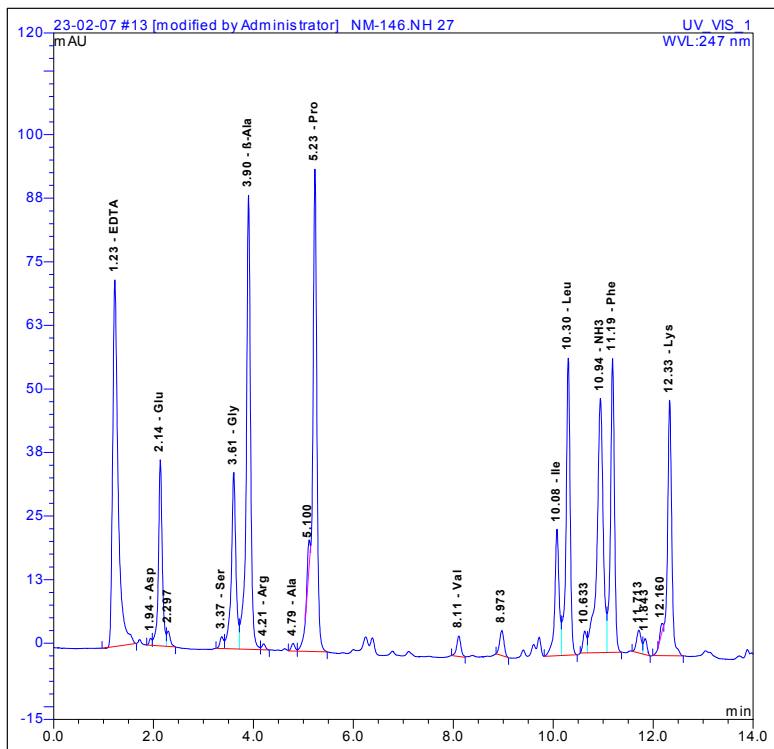

| RT<br>min     | RT (STD)<br>min | PW(50%)<br>min | Area<br>mAU*min | Height<br>mAU | Amount<br>pmol | Peak Name |
|---------------|-----------------|----------------|-----------------|---------------|----------------|-----------|
| 1.23          | 1.23            | 0.104          | 9.04            | 72.05         | 326.7          | EDTA      |
| 1.94          | 1.95            | n.a.           | 0.08            | 1.35          | 7.5            | Asp       |
| 2.14          | 2.14            | 0.074          | 3.25            | 36.61         | 222.7          | Glu       |
| 3.37          | 3.37            | n.a.           | 0.20            | 2.34          | 16.3           | Ser       |
| 3.61          | 3.61            | 0.085          | 3.72            | 34.70         | 239.5          | Gly       |
| 3.90          | 3.91            | 0.079          | 8.87            | 89.31         | 632.2          | β-Ala     |
| 4.21          | 4.21            | 0.081          | 0.10            | 1.16          | 7.7            | Arg       |
| 4.79          | 4.81            | 0.080          | 0.13            | 1.49          | 10.0           | Ala       |
| 5.23          | 5.24            | 0.079          | 10.37           | 94.87         | 540.2          | Pro       |
| 8.11          | 8.11            | 0.086          | 0.39            | 4.02          | 26.1           | Val       |
| 10.08         | 10.09           | 0.084          | 2.53            | 24.86         | 160.0          | Ile       |
| 10.30         | 10.31           | 0.079          | 5.51            | 58.42         | 403.4          | Leu       |
| 10.94         | 10.96           | 0.114          | 7.25            | 49.99         | 636.7          | NH3       |
| 11.19         | 11.20           | 0.079          | 5.33            | 57.76         | 401.6          | Phe       |
| 12.33         | 12.34           | 0.083          | 5.47            | 50.23         | 195.5          | Lys       |
| <b>Total:</b> |                 |                | 62.240          | 579.135       | 3826.22        |           |

**Table S3:** Sequences picked randomly

|     | X <sup>10</sup> | X <sup>9</sup> | X <sup>8</sup> | X <sup>5</sup> | X <sup>4</sup> | X <sup>3</sup> |
|-----|-----------------|----------------|----------------|----------------|----------------|----------------|
| 1   | Trp             | Tyr            | Leu            | Arg            | Leu            | Thr            |
| 2a  | Trp             | Ile            | Tyr            | Glu            | Asp            | Lys            |
| 2b  | Trp             | Tyr            | Glu            | Ile            | Asp            | Lys            |
| 3a  | Phe             | Tyr            | Glu            | Val            | Arg            | Thr            |
| 3b  | Val             | Tyr            | Thr            | Glu            | Arg            | Phe            |
| 4   | Phe             | Ser            | Leu            | Arg            | Arg            | Thr            |
| 5   | Phe             | Cys            | His            | Arg            | Trp            | Phe            |
| 6a  | Phe             | Cys            | His            | Val            | Trp            | Thr            |
| 6b  | His             | Cys            | Thr            | Val            | Trp            | Phe            |
| 7a  | His             | Cys            | Thr            | Glu            | Leu            | Lys            |
| 7b  | His             | Cys            | Glu            | Lys            | Leu            | Thr            |
| 8a  | Phe             | Ile            | Thr            | Ile            | Arg            | Lys            |
| 8b  | Trp             | Ser            | His            | Ile            | Leu            | Thr            |
| 9a  | His             | Ser            | Leu            | Ile            | Trp            | Thr            |
| 9b  | His             | Ile            | His            | Arg            | Leu            | Phe            |
| 10a | Trp             | Cys            | Thr            | Glu            | Arg            | Phe            |
| 10b | Phe             | Cys            | Glu            | Arg            | Trp            | Thr            |
| 11a | Trp             | Ile            | His            | Val            | Ala            | Cys            |
| 11b | Val             | Cys            | His            | Ile            | Trp            | Ala            |
| 12  | His             | Asp            | His            | Arg            | Leu            | Lys            |
| 13  | Val             | Asp            | Thr            | Arg            | Leu            | Thr            |
| 14  | His             | Ile            | Glu            | Ile            | Ala            | Phe            |
| 15  | Trp             | Ile            | His            | Arg            | Arg            | Thr            |
| 16  | Val             | Tyr            | Thr            | Glu            | Arg            | Phe            |
| 17  | Phe             | Tyr            | Glu            | Val            | Arg            | Thr            |
| 18a | Val             | Tyr            | His            | Ile            | Arg            | Thr            |
| 18b | His             | Ile            | Tyr            | Val            | Arg            | Thr            |
| 19  | Trp             | Tyr            | Thr            | Ile            | Arg            | Cys            |
| 20  | Trp             | Cys            | Tyr            | Ile            | Arg            | Thr            |
| 21  | Val             | Tyr            | Leu            | Lys            | Asp            | Lys            |
| 22  | Ser             | Asp            | Tyr            | Ile            | Trp            | Lys            |
| 23  | Trp             | Ser            | Tyr            | Ile            | Asp            | Lys            |
| 24a | Trp             | Tyr            | Leu            | Val            | Asp            | Lys            |
| 24b | Trp             | Asp            | Tyr            | Val            | Leu            | Lys            |
| 25a | Trp             | Ile            | Tyr            | Val            | Leu            | Ala            |
| 25b | Val             | Tyr            | Leu            | Ile            | Trp            | Ala            |
| 26  | Phe             | Ser            | Tyr            | Ile            | Leu            | Thr            |
| 27  | Ser             | Tyr            | Thr            | Ile            | Leu            | Phe            |
| 28  | Val             | Tyr            | Tyr            | Glu            | Leu            | Ala            |

## 7. Analytical HPLC profiles and mass spectra (+ESI-MS) data

### Peptide 3a: c(HDEPGIATPq)

Analytical RP-HPLC:  $t_R = 5.6$  min (5-100% B in 15 min)

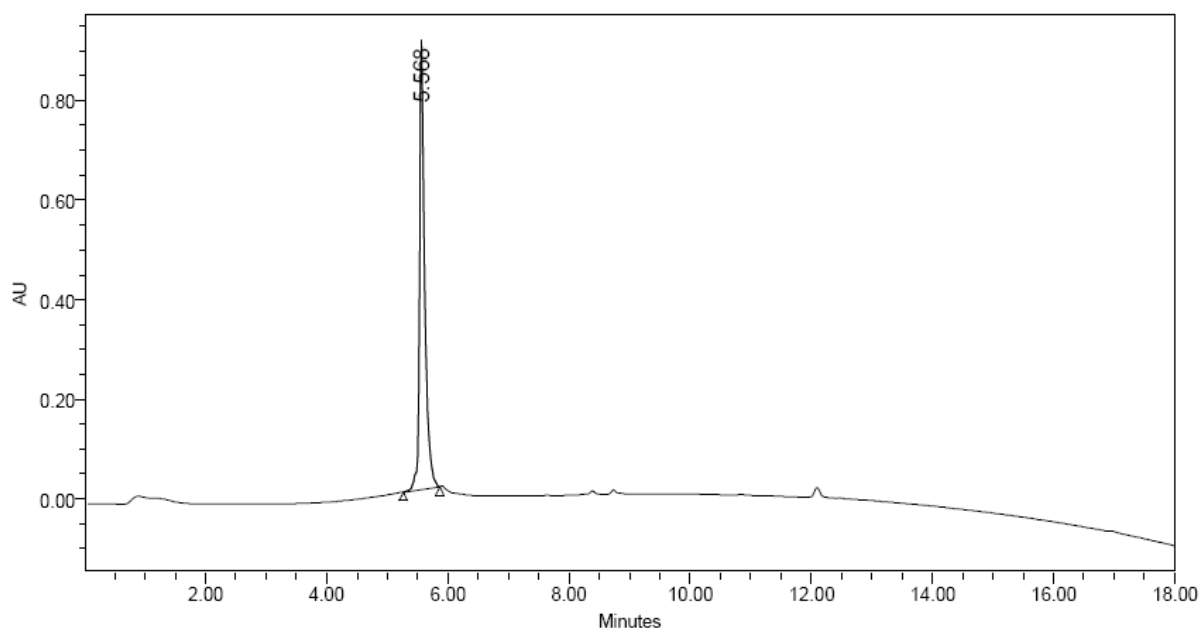

+ESI-MS calcd for  $C_{45}H_{68}N_{13}O_{16} [M+H]^+$ : 1046.5, found: 1046.6.

#### Acquisition Parameter

|                   |             |              |            |                          |          |
|-------------------|-------------|--------------|------------|--------------------------|----------|
| Ion Source Type   | ESI         | Ion Polarity | Positive   | Alternating Ion Polarity | off      |
| Mass Range Mode   | Std/Normal  | Scan Begin   | 100 m/z    | Scan End                 | 1800 m/z |
| Capillary Exit    | 169.4 Volt  | Skim 1       | 40.0 Volt  | Trap Drive               | 94.4     |
| Accumulation Time | 689 $\mu$ s | Averages     | 20 Spectra | Auto MS/MS               | off      |

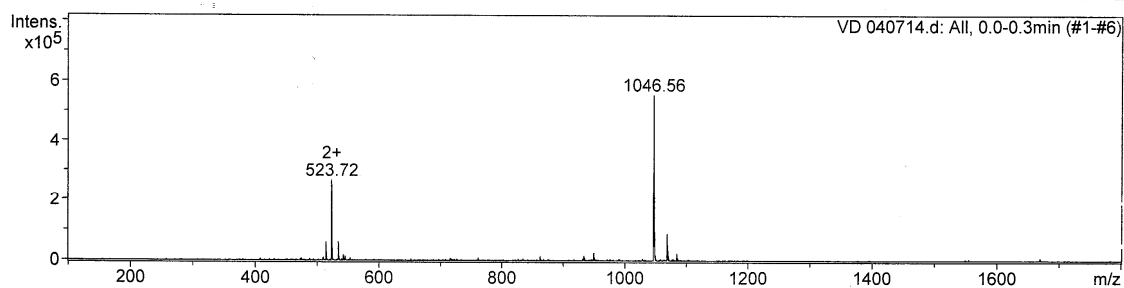



### Peptide 3b: c(HITPGEDAPq)

Analytical RP-HPLC:  $t_R = 5.1$  min (5-100% B in 15 min)

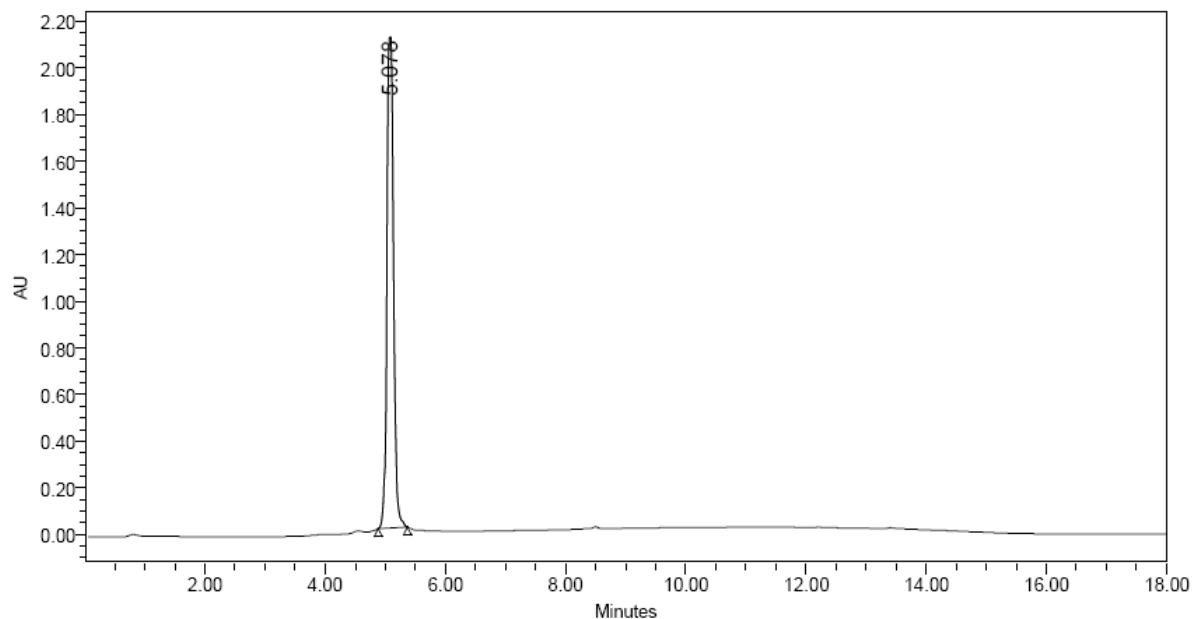

+ESI-MS calcd for  $C_{45}H_{68}N_{13}O_{16}$   $[M+H]^+$ : 1046.5, found: 1046.6.

#### Acquisition Parameter

|                   |             |              |            |                          |          |
|-------------------|-------------|--------------|------------|--------------------------|----------|
| Ion Source Type   | ESI         | Ion Polarity | Positive   | Alternating Ion Polarity | off      |
| Mass Range Mode   | Std/Normal  | Scan Begin   | 50 m/z     | Scan End                 | 1500 m/z |
| Capillary Exit    | 169.4 Volt  | Skim 1       | 40.0 Volt  | Trap Drive               | 94.4     |
| Accumulation Time | 259 $\mu$ s | Averages     | 20 Spectra | Auto MS/MS               | off      |

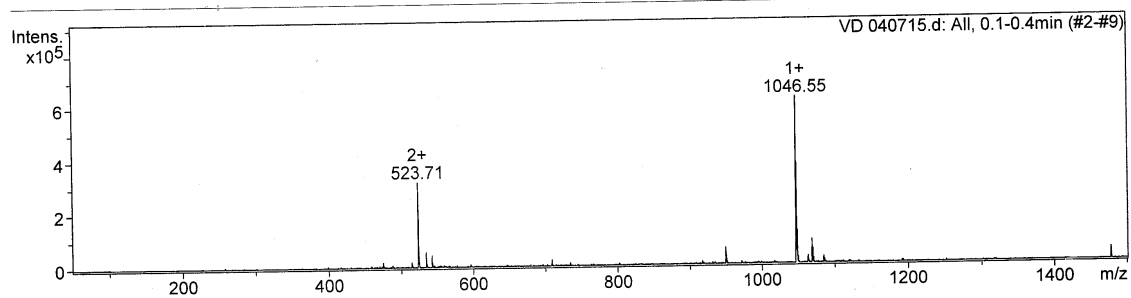

**Peptide 4: c(VDEPGEDCPq)**

Analytical RP-HPLC:  $t_R = 7.9$  min (5-40% B in 15 min)

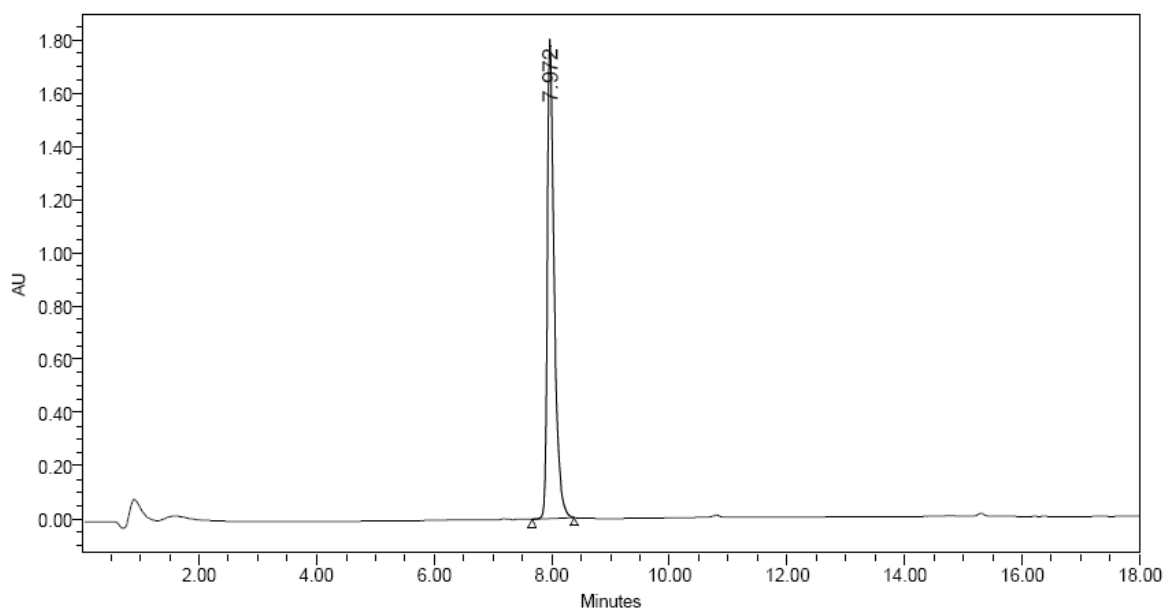

+ESI-MS calcd for  $C_{43}H_{64}N_{11}O_{19}S$   $[M+H]^+$ : 1070.4, found: 1070.6.

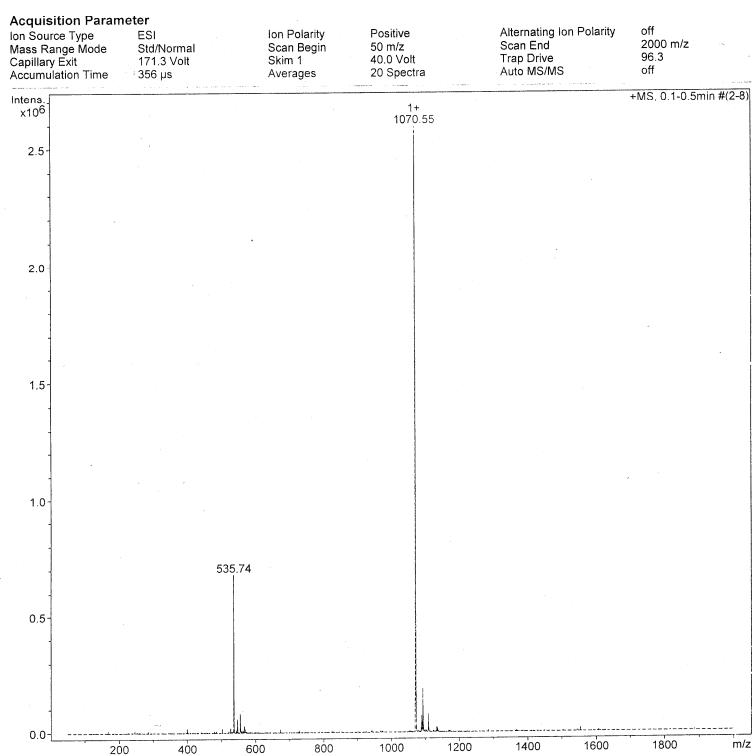

### Peptide 4His: c(VDEPGEDHPq)

Analytical RP-HPLC:  $t_R = 6.5$  min (5-40% B in 15 min)

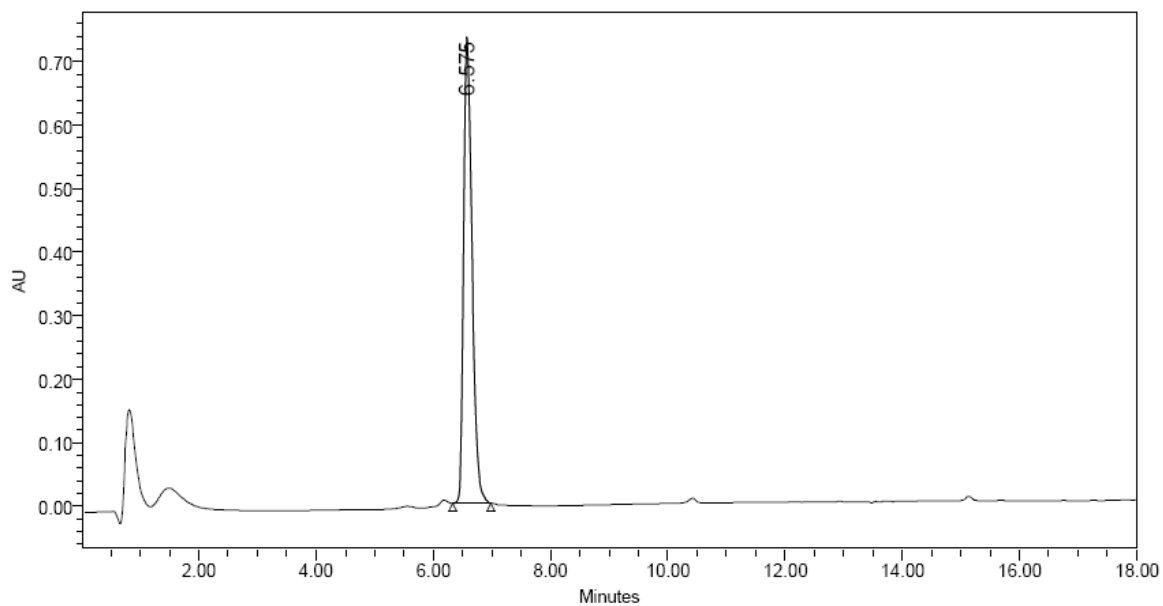

+ESI-MS calcd for  $C_{46}H_{66}N_{13}O_{19} [M+H]^+$ : 1104.5, found: 1104.6.

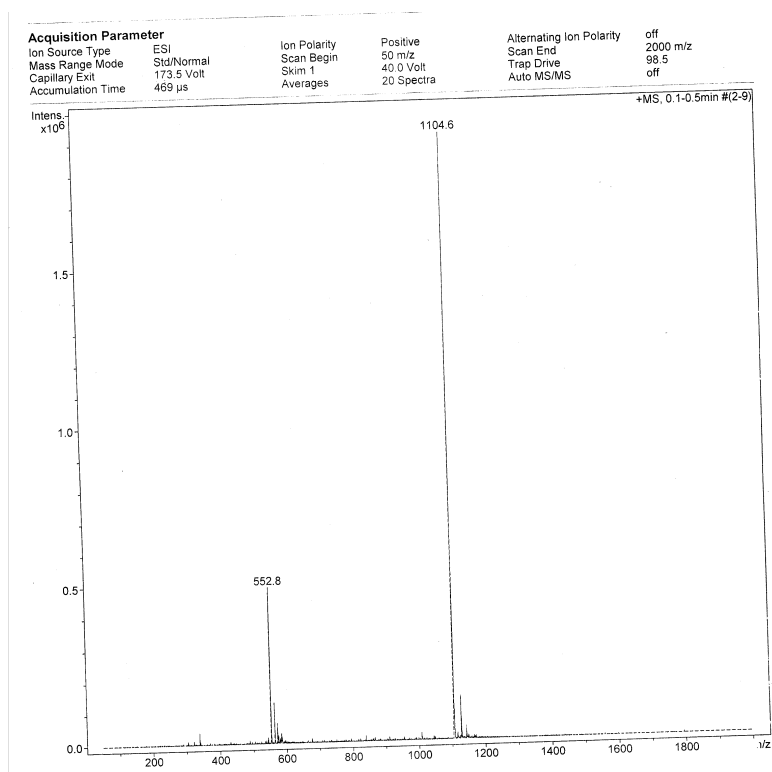

**Peptide 4': VDEPGEDCPG-NH<sub>2</sub>**

Analytical RP-HPLC:  $t_R = 5.0$  min (5-100% B in 15 min)

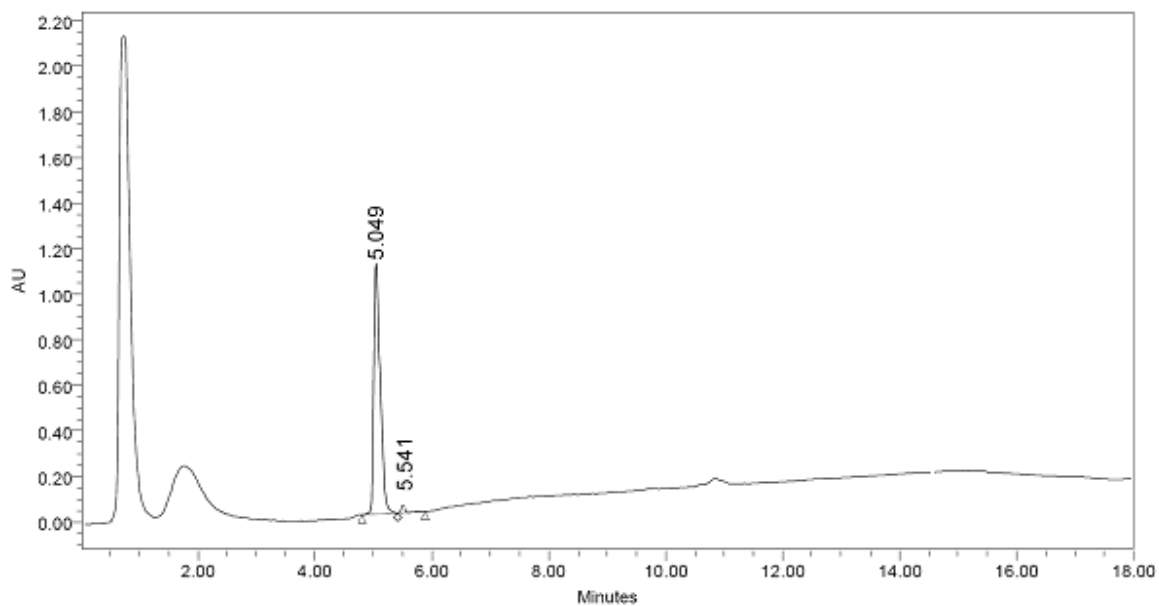

+ESI-MS calcd for C<sub>40</sub>H<sub>62</sub>N<sub>11</sub>O<sub>18</sub>S [M+H]<sup>+</sup>: 1016.4, found: 1016.4.

**Acquisition Parameter**

|                   |             |              |            |                          |          |
|-------------------|-------------|--------------|------------|--------------------------|----------|
| Ion Source Type   | ESI         | Ion Polarity | Positive   | Alternating Ion Polarity | off      |
| Mass Range Mode   | Std/Normal  | Scan Begin   | 150 m/z    | Scan End                 | 1200 m/z |
| Capillary Exit    | 158.5 Volt  | Skim 1       | 40.0 Volt  | Trap Drive               | 63.6     |
| Accumulation Time | 534 $\mu$ s | Averages     | 20 Spectra | Auto MS/MS               | off      |

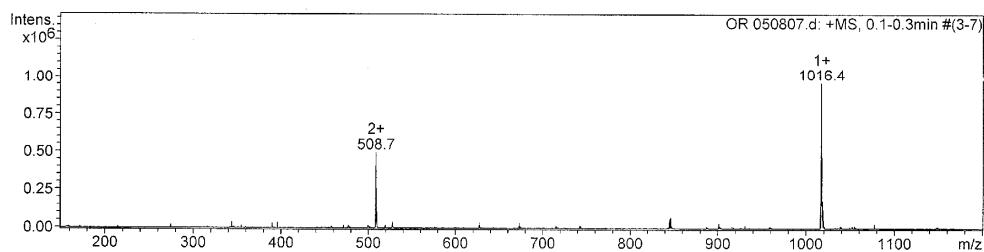

**Peptide 4'Ac: Ac-VDEPGEDCPG-NH<sub>2</sub>**

Analytical RP-HPLC:  $t_R = 5.6$  min (5-100% B in 15 min)

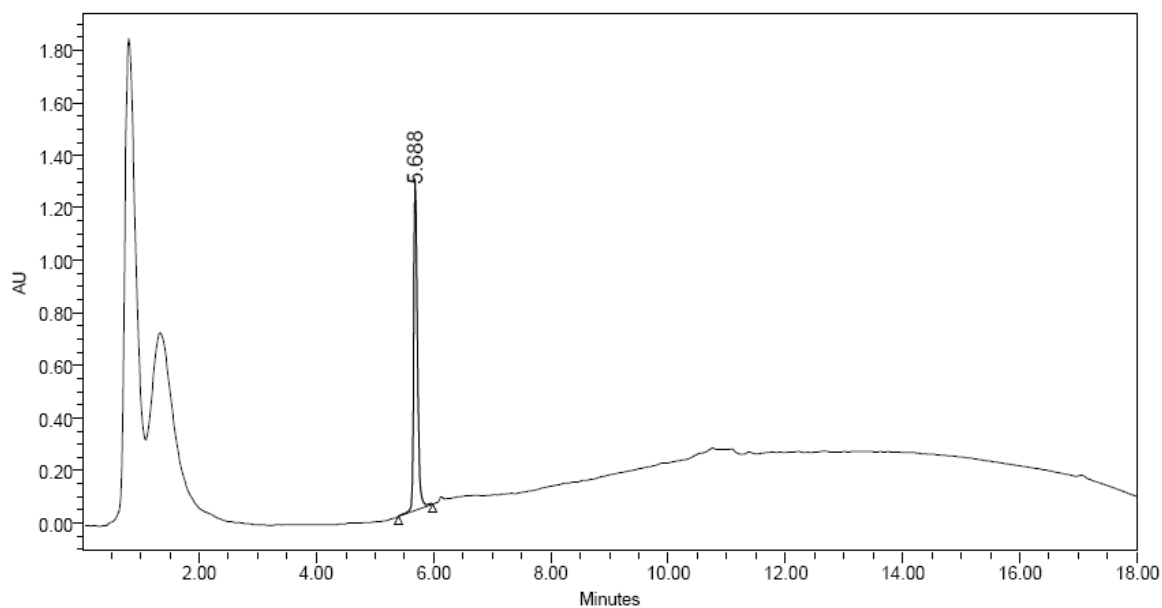

+ESI-MS calcd for C<sub>42</sub>H<sub>64</sub>N<sub>11</sub>O<sub>19</sub>S [M+H]<sup>+</sup>: 1058.4, found: 1058.4.

**Acquisition Parameter**

|                   |             |              |            |                          |          |
|-------------------|-------------|--------------|------------|--------------------------|----------|
| Ion Source Type   | ESI         | Ion Polarity | Positive   | Alternating Ion Polarity | off      |
| Mass Range Mode   | Std/Normal  | Scan Begin   | 150 m/z    | Scan End                 | 1200 m/z |
| Capillary Exit    | 158.5 Volt  | Skim 1       | 40.0 Volt  | Trap Drive               | 83.6     |
| Accumulation Time | 570 $\mu$ s | Averages     | 20 Spectra | Auto MS/MS               | off      |

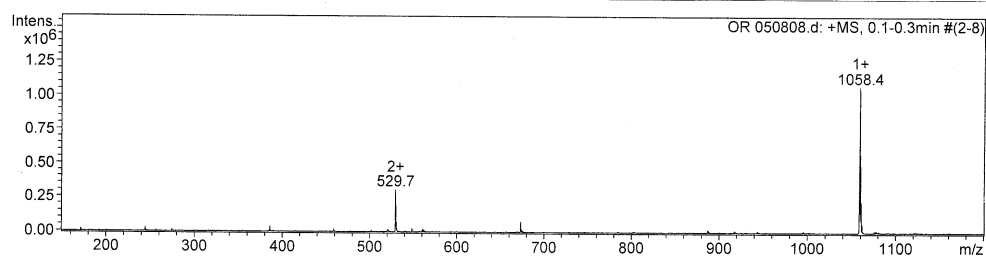

### Peptide 4His' : VDEPGEDHPG-NH<sub>2</sub>

Analytical RP-HPLC:  $t_R = 4.5$  min (5-100% B in 15 min)

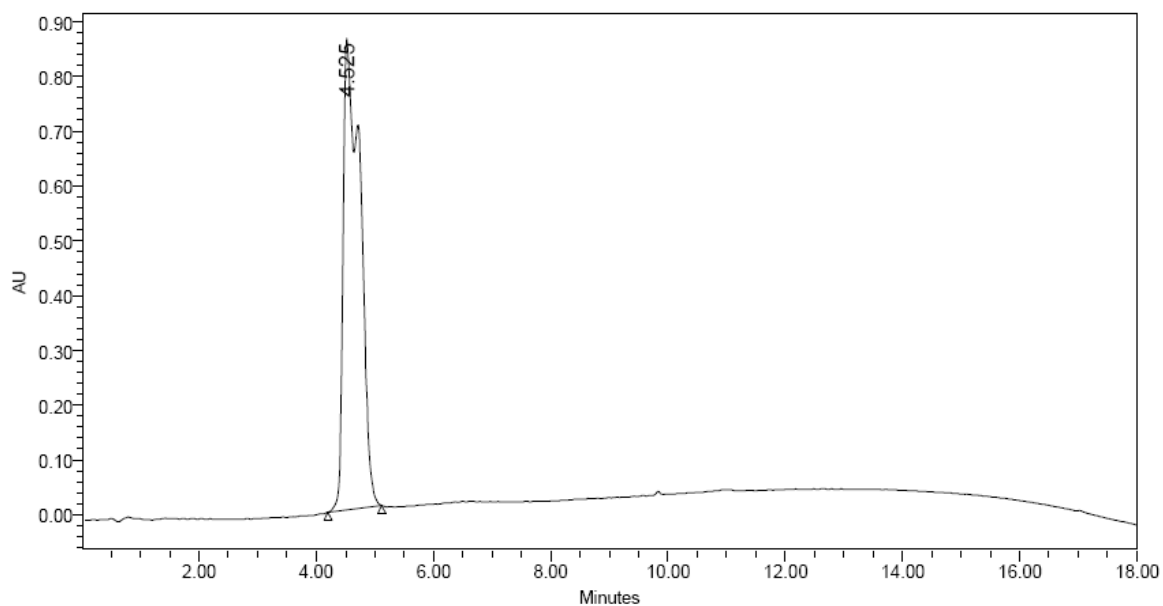

+ESI-MS calcd for C<sub>44</sub>H<sub>66</sub>N<sub>12</sub>O<sub>18</sub> [M+H]<sup>+</sup>: 1050.5, found: 1050.4.

#### Acquisition Parameter

|                   |            |              |            |                          |          |
|-------------------|------------|--------------|------------|--------------------------|----------|
| Ion Source Type   | ESI        | Ion Polarity | Positive   | Alternating Ion Polarity | off      |
| Mass Range Mode   | Std/Normal | Scan Begin   | 200 m/z    | Scan End                 | 1200 m/z |
| Capillary Exit    | 173.5 Volt | Skim 1       | 40.0 Volt  | Trap Drive               | 98.5     |
| Accumulation Time | 81 $\mu$ s | Averages     | 20 Spectra | Auto MS/MS               | off      |

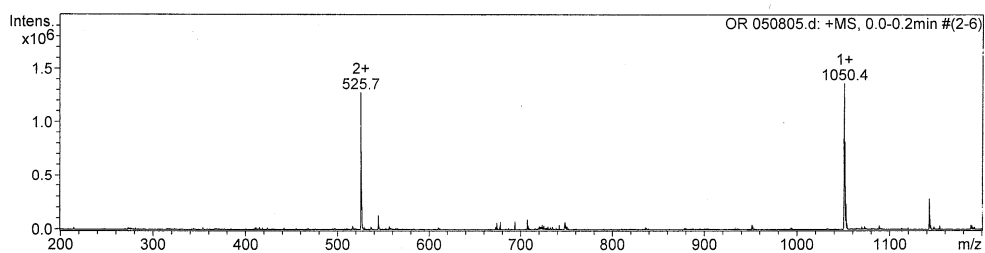

### Peptide 4His'Ac: Ac-VDEPGEDHPG-NH<sub>2</sub>

Analytical RP-HPLC:  $t_R = 6.0$  min (5-100% B in 15 min)

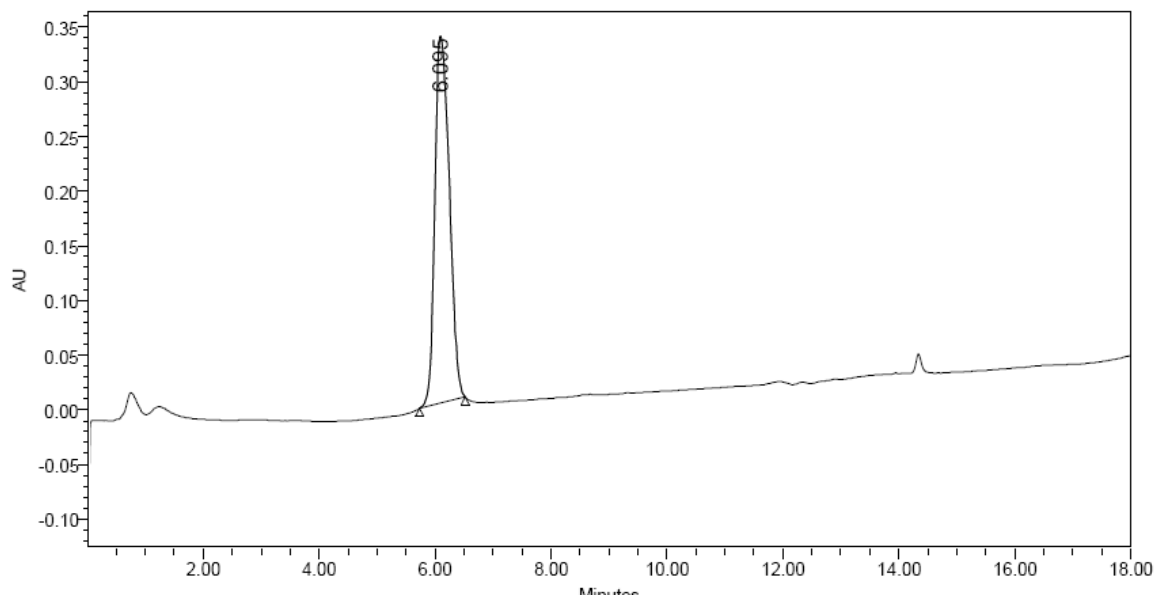

+ESI-MS calcd for C<sub>45</sub>H<sub>66</sub>N<sub>13</sub>O<sub>19</sub> [M+H]<sup>+</sup>: 1092.5, found: 1092.5.

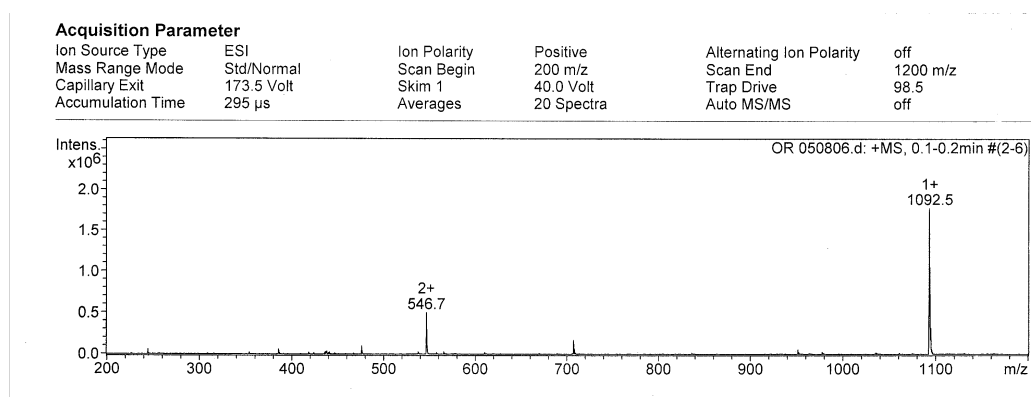

### Peptide 9: c(HCTPGELAPq)

Analytical RP-HPLC:  $t_R = 5.6$  min (5-100% B in 15 min)

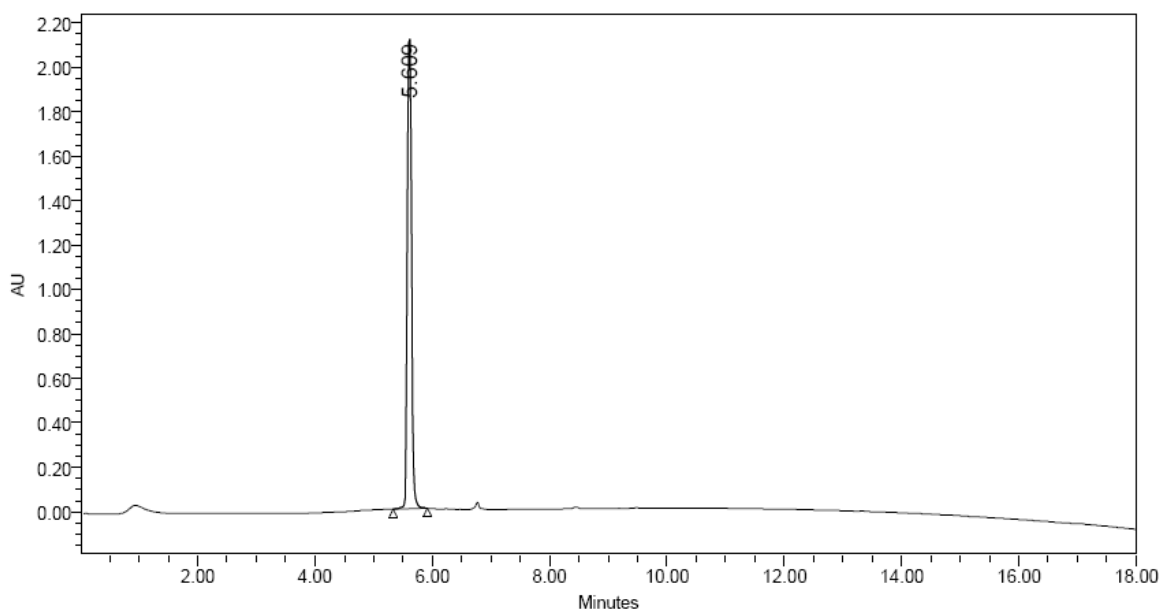

+ESI-MS calcd for  $C_{44}H_{68}N_{13}O_{14}S$   $[M+H]^+$ : 1034.2, found: 1034.5.

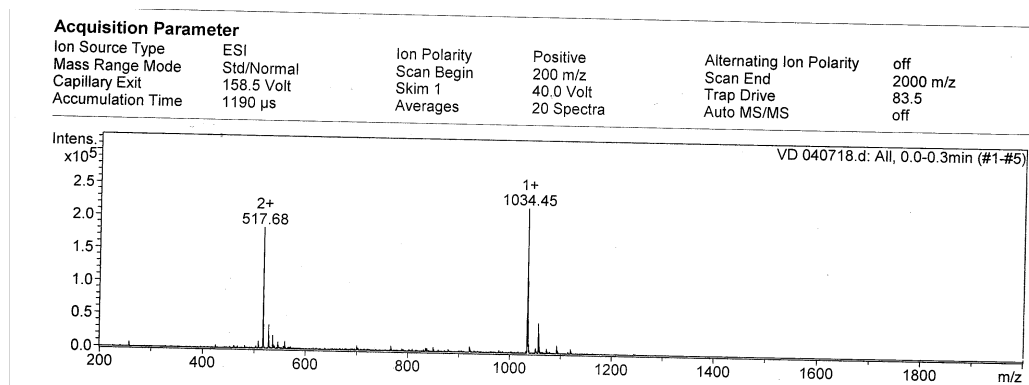



### Peptide 11: c(VIEPGEDCPq)

Analytical RP-HPLC:  $t_R = 5.6$  min (5-100% B in 15 min)

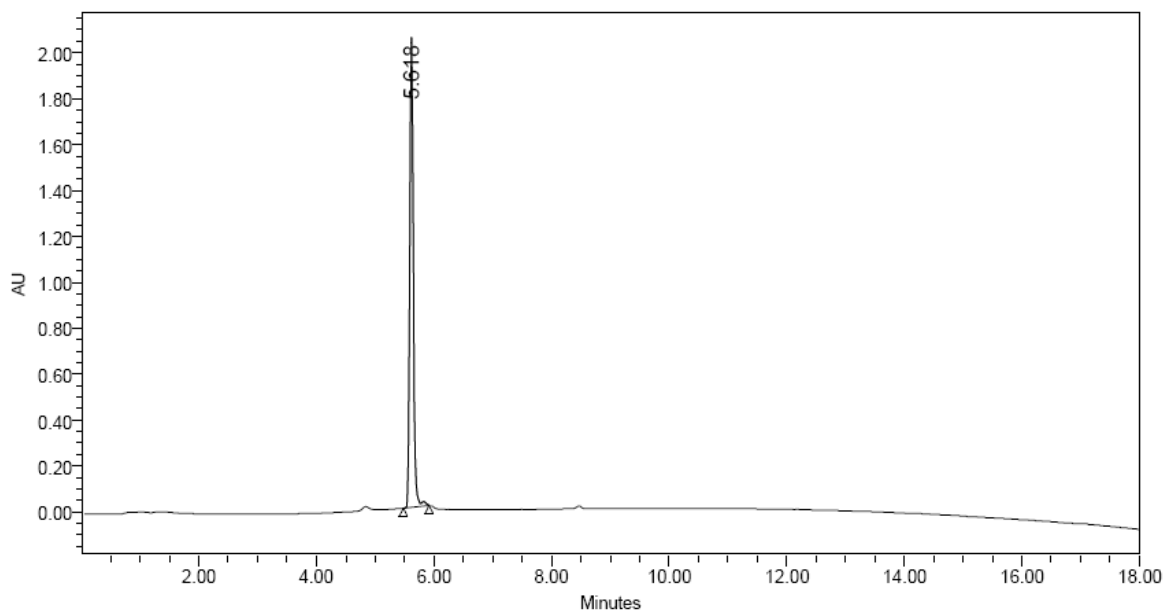

+ESI-MS calcd for  $C_{45}H_{69}N_{11}O_{17}S$   $[M+H]^+$ : 1068.2, found: 1068.6.

#### Acquisition Parameter

|                   |             |              |            |                          |          |
|-------------------|-------------|--------------|------------|--------------------------|----------|
| Ion Source Type   | ESI         | Ion Polarity | Positive   | Alternating Ion Polarity | off      |
| Mass Range Mode   | Std/Normal  | Scan Begin   | 150 m/z    | Scan End                 | 1500 m/z |
| Capillary Exit    | 171.0 Volt  | Skim 1       | 40.0 Volt  | Trap Drive               | 96.1     |
| Accumulation Time | 212 $\mu$ s | Averages     | 20 Spectra | Auto MS/MS               | off      |

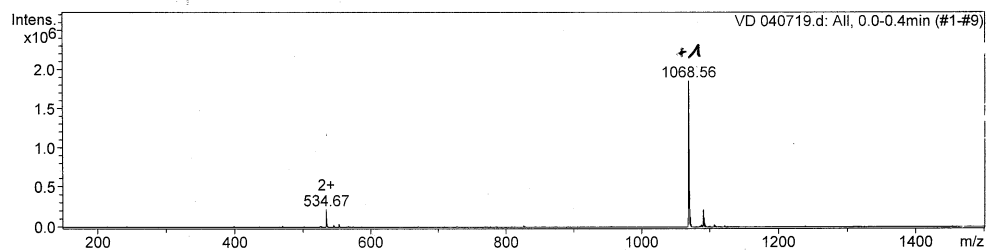

**Peptide 12: c(VIEPGEDAPq)**

Analytical RP-HPLC:  $t_R = 5.7$  min (5-100% B in 15 min)

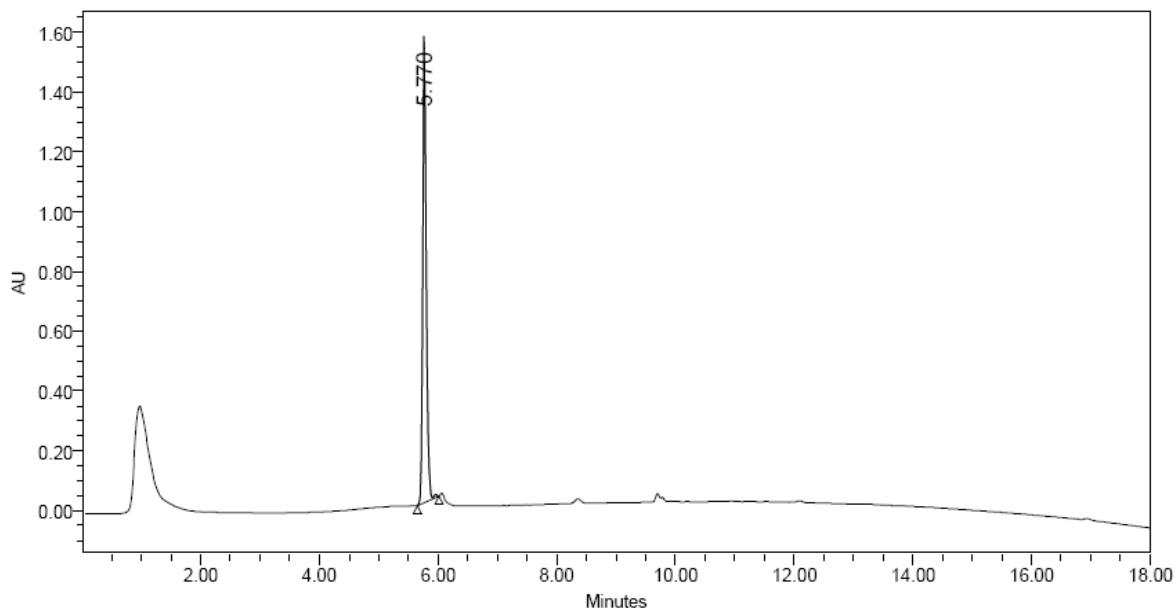

+ESI-MS calcd for  $C_{45}H_{69}N_{11}O_{17}S$   $[M+H]^+$ : 1036.2, found: 1036.6.

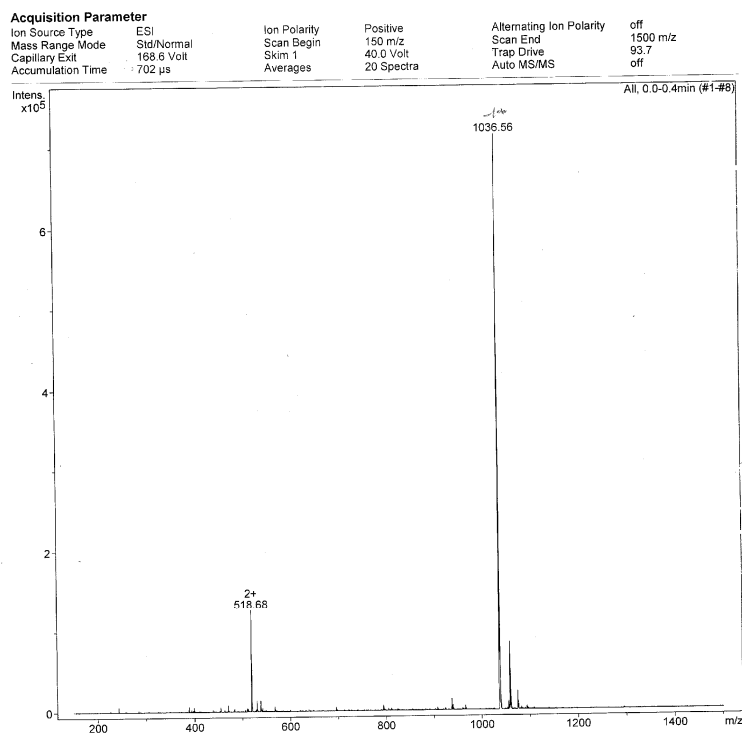

Supplement: b811234g.pdf [file b811234g.pdf]
